# Supplementary material for: Effectiveness and Coverage of Treatment for Severe Acute Malnutrition Delivered by Community Health Workers in the Guidimakha Region, Mauritania
Source: MDPI journal article supplement (doi:10.3390/children8121132), 2021-12-04

# MODULE 1.

## ACCUEIL, SIGNES DE DANGER ET RÉFÉRENCEMENT

Module de Formation des Agents de Santé  
Communautaire sur le Protocole PCIMA

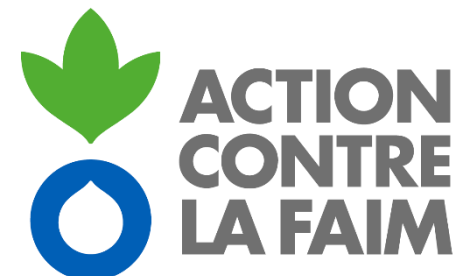

# OBJECTIFS PÉDAGOGIQUES

---

A la fin de ce module, l'agent de santé communautaire (ASC) doit être capable de:

1. Disposer des mesures minimales pour accueillir les enfants et les accompagnantes
2. Référer les enfants présentant des complications médicales vers les structures de santé

# CE DONT L'ASC A BESOIN

---

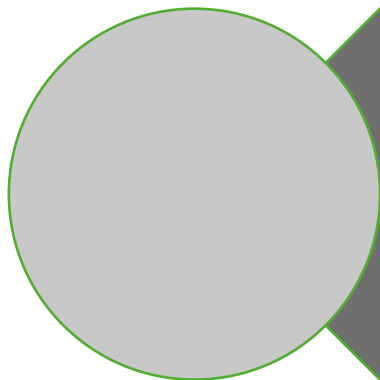

**avoir un espace** pour  
que la mère puisse  
s'asseoir (**Hangar**)

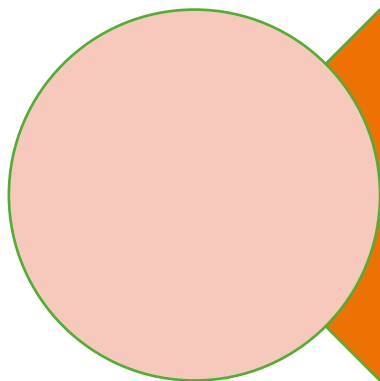

la disponibilité d'un  
dispositif de lavage  
des mains au savon

# IDENTIFIER LE PROBLÈME DE L'ENFANT

---

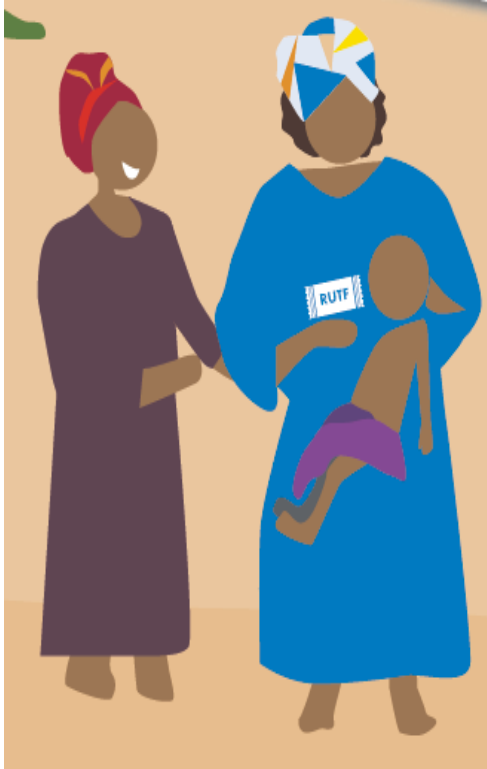

Demandez à la mère :

1. De quoi l'enfant se plaint-il ?
2. Combien de jours l'enfant a-t-il été malade ?
3. A-t-il été traité ou emmené dans un autre lieu pour y être soigné ?

Identifier le  
problème de  
l'enfant

# EXAMEN PHYSIQUE DE L'ENFANT

---

1. prendre la température corporelle
2. Après avoir touché l'enfant
3. Après avoir salué la mère ou l'accompagnant
4. Avant d'effectuer toute intervention de nettoyage ou d'aseptique,
5. Après exposition aux fluides corporels ( urines, sang)

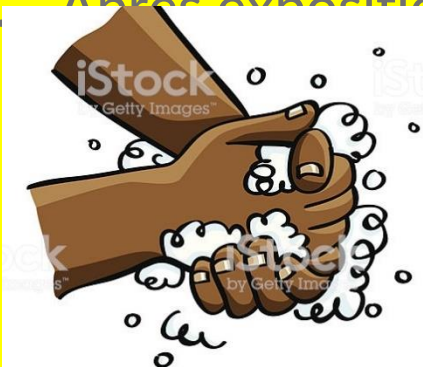

# RECHERCHE DE SIGNES DE DANGER DE L'ENFANT

## Interrogatoire. Ecouter à la mère

Diarrhée de plus de 2 semaines

Diarrhée avec du sang

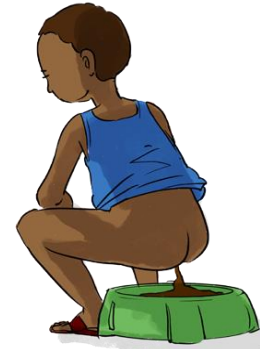

Toux et fièvre de plus de 2 semaines ( 14 jours)

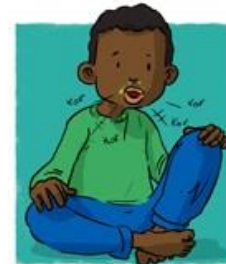

Fièvre de plus de 7 jours

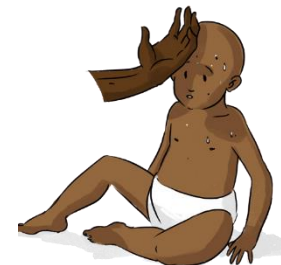

# RECHERCHE DE SIGNES DE DANGER DE L'ENFANT

## Observation de l'enfant

Incapable de boire ou de téter

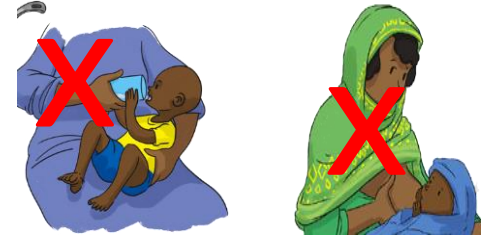

Vomit tout ce qu'il consomme

Sommeil inhabituel ou  
inconscient

Convulsion

# RECHERCHE DE SIGNES DE DANGER DE L'ENFANT

## Examen physique de l'enfant

Prendre le temperature

Pâleur palmaire

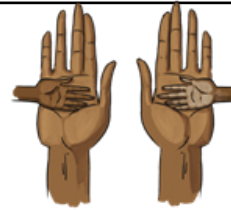

Respiration difficile et rapide

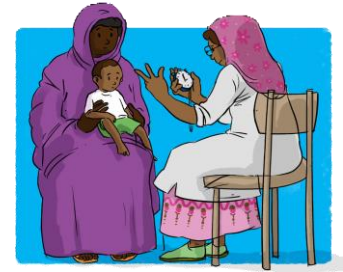

Raideur de la nuque

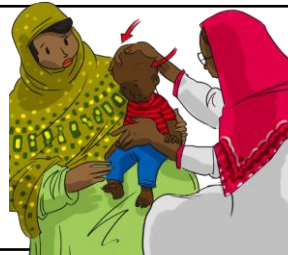

Périmètre brachial rouge + test de l'appétit médiocre + Œdème +++

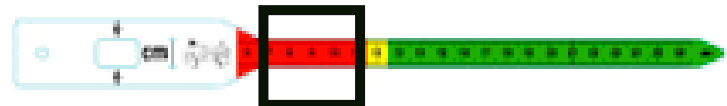



# RECHERCHE DE SIGNES DE DANGER DE L'ENFANT

---

## Examen physique de l'enfant

Pâleur palmaire

Comparer les paumes de l'ASC à celle de l'enfant : la pâleur montre une main blanche tandis qu'une bonne coloration montrera une rougeur de la paume de la main de l'enfant

Respiration difficile et rapide

Compter les respirations par minute, rechercher un tirage sous-costal, écouter une respiration sifflante,

Raideur de la nuque

Regarder si l'enfant remue et fléchit le cou sans difficulté pendant qu'il regarde autour de lui. Si l'enfant remue et plie le cou, il n'a pas de raideur.

Pour rechercher la raideur du cou, demander à la mère de tenir l'enfant assis sur ses cuisses ; l'ASC place une main derrière la tête de l'enfant au niveau du cou et fléchit doucement en posant l'autre main sur la poitrine de l'enfant. Si le cou se plie aisément et le « menton touche la poitrine » l'enfant n'a pas de raideur du cou ou raideur de la nuque. Si le menton ne touche pas la

# RECHERCHE DE SIGNES DE DANGER DE L'ENFANT

---

## Examen physique de l'enfant

Périmètre brachial rouge

PB rouge avec des autres signes de danger

Œdème +++

# PRENDRE LE PÉRIMÈTRE BRACHIAL (PB)

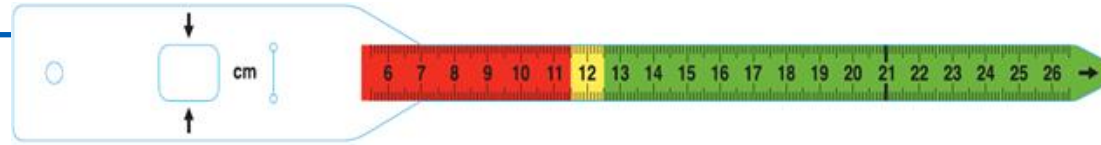

Trouvez, sur le bras de l'enfant, le point central

Apposez l'extrémité la plus large de la bandelette sur ce point central.

Enroulez l'autre extrémité de la bandelette autour du bras de l'enfant

Pas trop serré

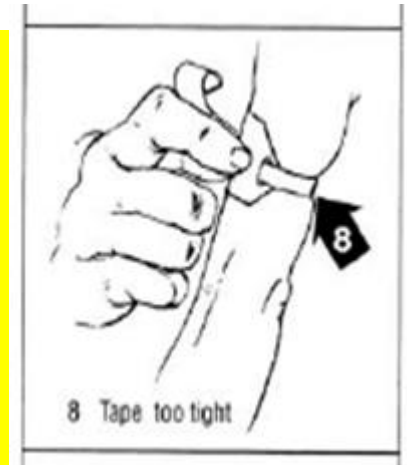

Pas trop lâche

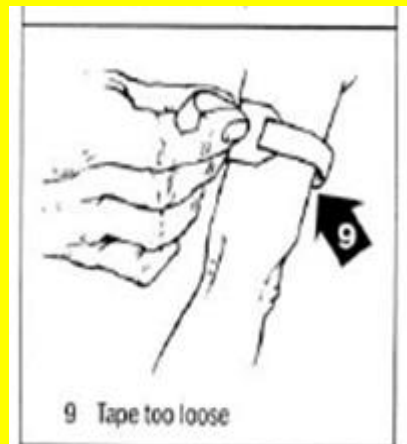

# VÉRIFIER LES ŒDÈMES BILATÉRAUX

1. On exerce une pression normale avec le pouce sur les deux pieds pendant au moins trois secondes
2. Si l'empreinte du pouce persiste sur les deux pieds

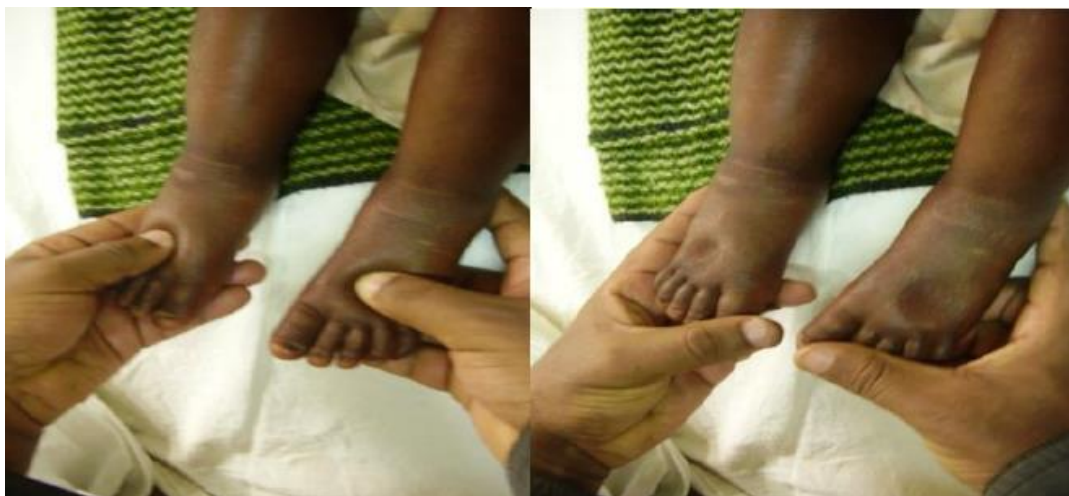

ENFANT  
MALNUTRITION  
AIGUE SEVERE

## Sévérité des oedèmes Codification

- Œdèmes Sévères+++ : généralisés soit incluant les 2 pieds, jambes, mains, bras et le visage

# TRANSFÉRER CENTRE DE SANTÉ

## 1. Ecouter à la mère

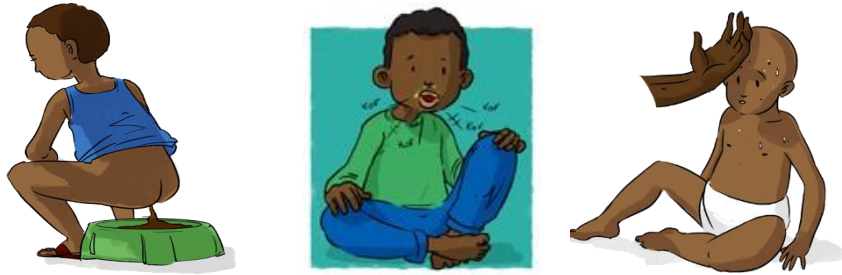

## 2. Observation de l'enfant

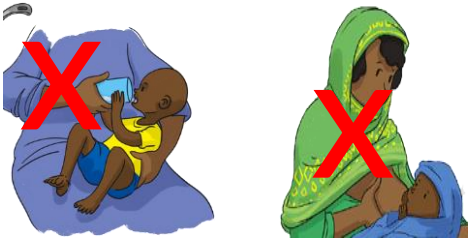

## 2. Examen physique de l'enfant

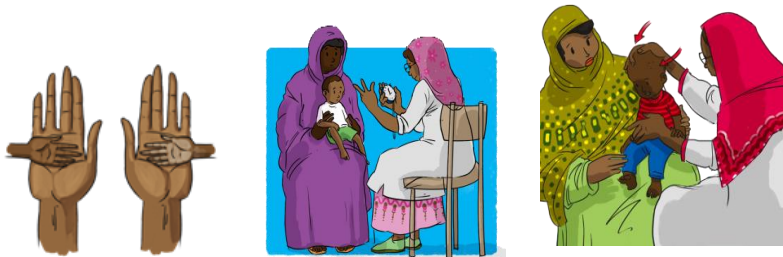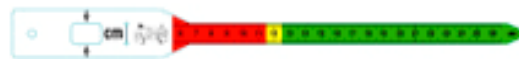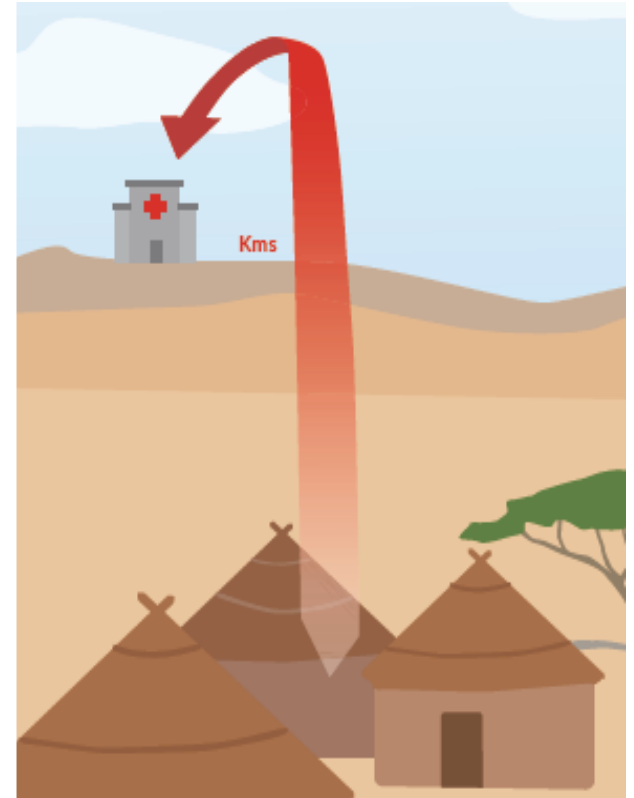

# AVANT DE RÉFÉRER LES SIGNES IDENTIFIÉS

Continuer à faire téter ou  
boire sen cours de route si  
l'enfant peut

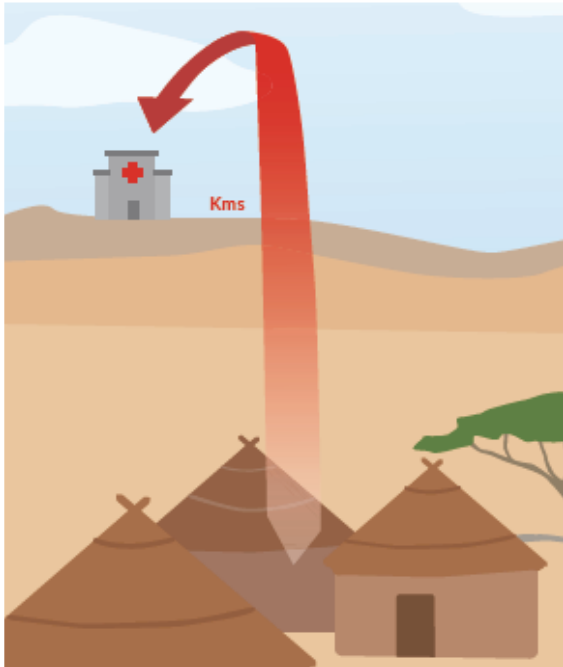

Diarrhée  
Donner du SRO,

Diarrhée + PB rouge  
Donner de l'eau sucrée

Fièvre+ TDR positive  
Donner 1 dose  
artésunate

Fièvre+ infection  
respiratoires  
Donner 1 dose  
amoxicilline

# MESSAGES CLÉS

---

| Question                                                                                       | réponse                                                                                                                                                                                                                                                                                                                      |
|------------------------------------------------------------------------------------------------|------------------------------------------------------------------------------------------------------------------------------------------------------------------------------------------------------------------------------------------------------------------------------------------------------------------------------|
| 1. Quelles sont les moments que l'ASC doit se laver les mains ?                                | <ul style="list-style-type: none"><li>• Prendre la température corporelle</li><li>• Après avoir touché l'enfant</li><li>• Après avoir salué la mère ou l'accompagnant</li><li>• Avant d'effectuer toute intervention de nettoyage ou d'aseptique,</li><li>• Après exposition aux fluides corporels ( urines, sang)</li></ul> |
| 2. Trois premières choses que l'ASC doit toujours faire pour la recherche des signes de danger | <p>Ecouter la mère ou la gardienne de l'enfant</p> <p>Observer l'enfant</p> <p>Examen physique de l'enfant</p>                                                                                                                                                                                                               |

# MESSAGES CLÉS

| Question                                                                               | réponse                                                                                                                                                      |
|----------------------------------------------------------------------------------------|--------------------------------------------------------------------------------------------------------------------------------------------------------------|
| 3. Lesquels des signes de danger la mère peut expliquer à l'ASC?                       | Diarrhée de plus de 14 jours<br>Diarrhée avec du sang<br>Vomit tout ce qu'il consomme<br>Toux de plus de 14 jours<br>Fièvre de plus de 7 jours               |
| 4. Lesquels des signes de danger l'ASC peut observer ?                                 | Incapable de boire ou de téter<br>Sommeil inhabituel ou inconscient<br>Convulsion                                                                            |
| 5. Lesquels des signes de danger l'ASC peut constater à l'examen physique de l'enfant? | Fièvre<br>Pâleur palmaire<br>Respiration difficile et rapide<br>Raideur de la nuque<br>PB avec coloration rouge avec appétit faible ou Œdèmes bilatéraux +++ |



# QUESTIONS RAPIDES

---

| L'enfant présente-t-il un signe de danger ?                                         | Oui | Non | Référer l'enfant |
|-------------------------------------------------------------------------------------|-----|-----|------------------|
| Sam - tousse pendant 2 semaines                                                     | X   |     | X                |
| Murat - tousse pendant 2 mois                                                       | X   |     | X                |
| La beauté - fait une diarrhée avec présence de sang dans les selles pendant 3 jours | X   |     | X                |
| Marco - a une diarrhée pendant 10 jours                                             |     | X   |                  |
| Salimata- a un PB rouge- test appétit bonne                                         |     | X   |                  |
| Amina - fièvre pendant 3 jours                                                      |     | X   |                  |
| Nilgun - fièvre pendant 8 jours                                                     |     | X   |                  |
| Ida - diarrhée pendant 2 semaines                                                   |     | X   |                  |
| Tika - a fait une convulsion hier                                                   | X   |     | X                |
| Carmen - a une toux pendant 1 mois                                                  | X   |     | X                |
| Maria - vomit de la nourriture mais boit de l'eau                                   | X   |     | X                |
| Thomas - n'a rien mangé ni bu à cause des plaies buccales                           | X   |     | X                |
| Abdoul- PB rouge+ test appétit médiocre                                             | X   |     | X                |

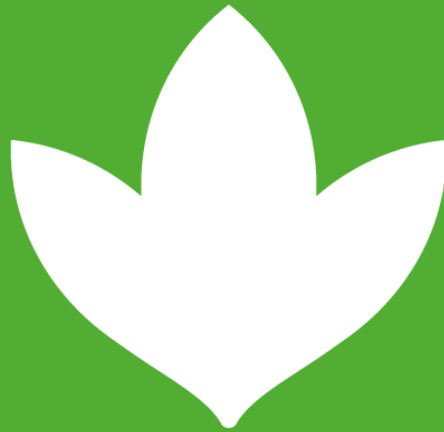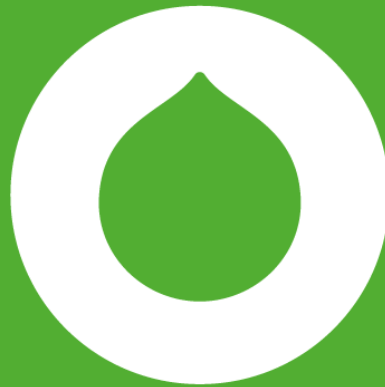

Insérez votre site web

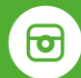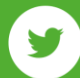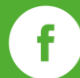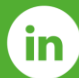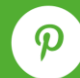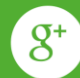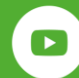

# **MODULE 2**

## **TRIAGE ET ADMISSION DE L'ENFANT SOUFFRANT DE MALNUTRITION AIGUE**

Module de Formation des Agents de Santé Communautaire sur le Protocole PCIMA

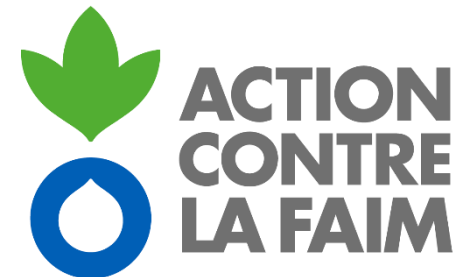

# OBJECTIFS DU MODULE 2

---

A la fin de ce module, l'agent de santé communautaire (ASC) doit être capable de:

1. Savoir prendre les mesures anthropométriques de l'enfant
2. Maîtriser les procédures de triage
3. Admettre un enfant avec une malnutrition aiguë sévère sans complications médicales
4. Référer les enfants avec une malnutrition aiguë sévère avec des complications

# CE DONT L'ASC A BESOIN

---

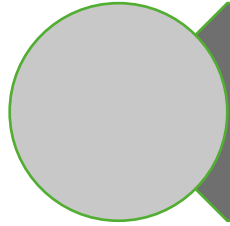

**La disponibilité d'un dispositif de lavage des mains au savon**

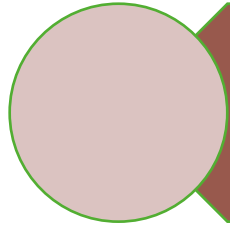

**La disponibilité de l'eau potable pour boire**

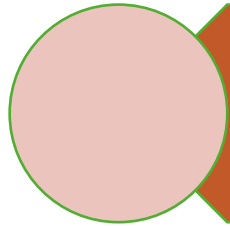

**Une balance**

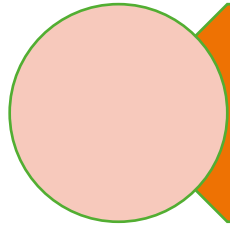

**Une Bande de Shakir ou MUAC**

# LAVAGE DE MAINS AU SAVON

---

L'ASC doit se laver les mains avec savon

1. Avant de toucher l'enfant,
2. Après avoir touché l'enfant
3. Après avoir salué la mère ou l'accompagnant
4. Avant d'effectuer toute intervention de nettoyage ou d'aseptique,
5. Après exposition aux fluides corporels ( urines, sang)

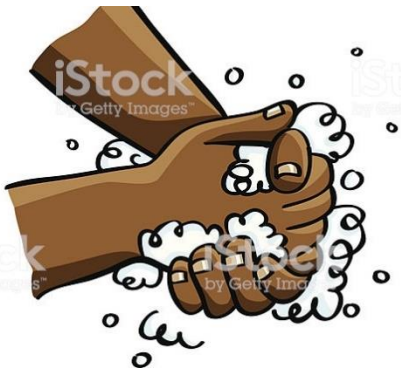

# PRENDRE LE PÉRIMÈTRE BRACHIAL (PB)

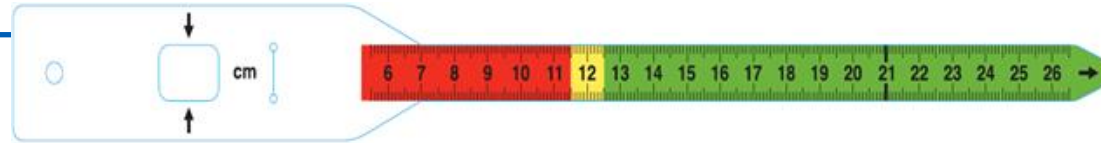

Trouvez, sur le bras de l'enfant, le point central

Apposez l'extrémité la plus large de la bandelette sur ce point central.

Enroulez l'autre extrémité de la bandelette autour du bras de l'enfant

Pas trop serré

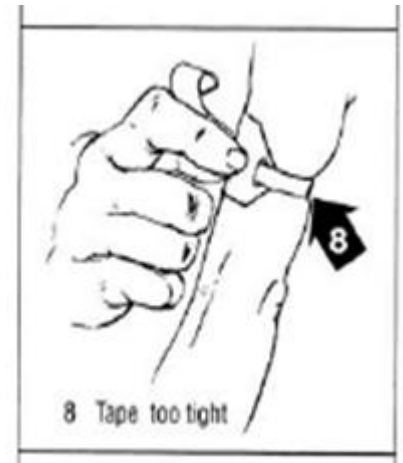

Pas trop lâche

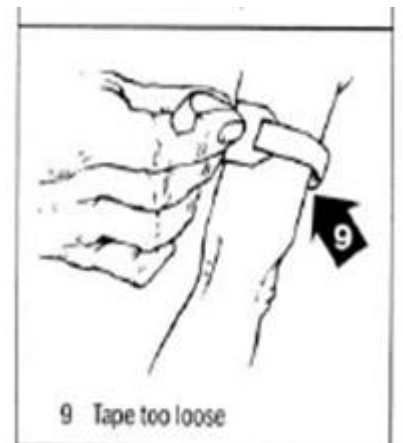

# PRENDRE LE PÉRIMÈTRE BRACHIAL (PB)

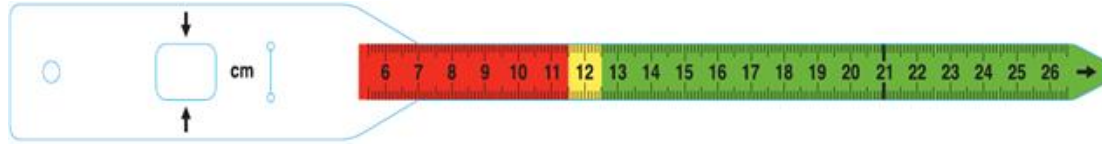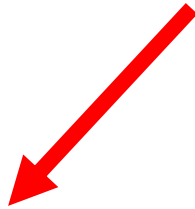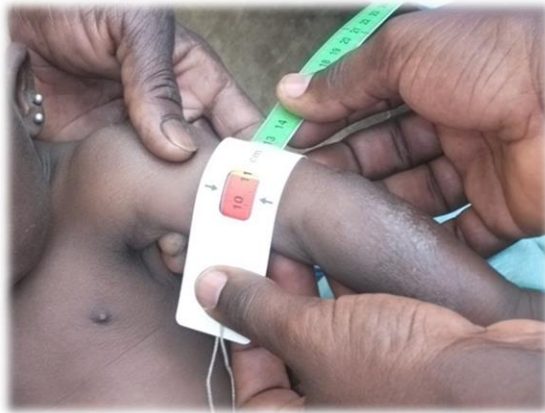

ENFANT  
MALNUTRITION  
AIGUE SEVERE  
< 115mm

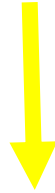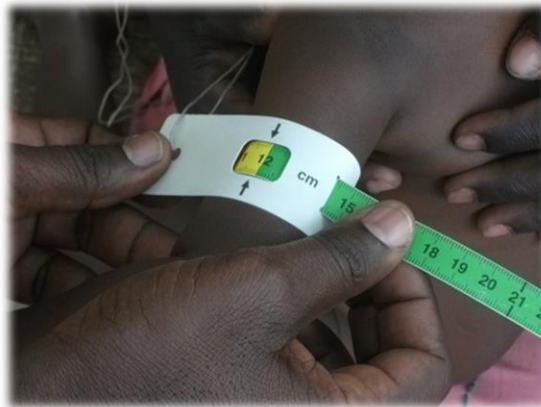

ENFANT  
MALNUTRITION  
AIGUE MODERE  
115-125mm

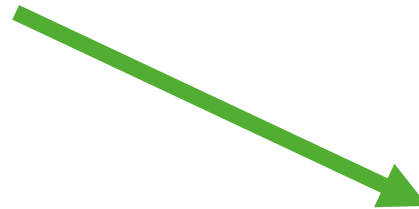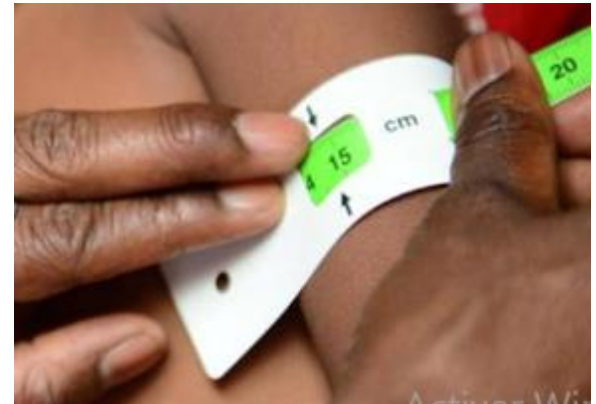

ENFANT BIEN  
NUTRI >125mm



# VÉRIFIER LES ŒDÈMES BILATÉRAUX

1. On exerce une pression normale avec le pouce sur les deux pieds pendant au moins trois secondes
2. Si l'empreinte du pouce persiste sur les deux pieds

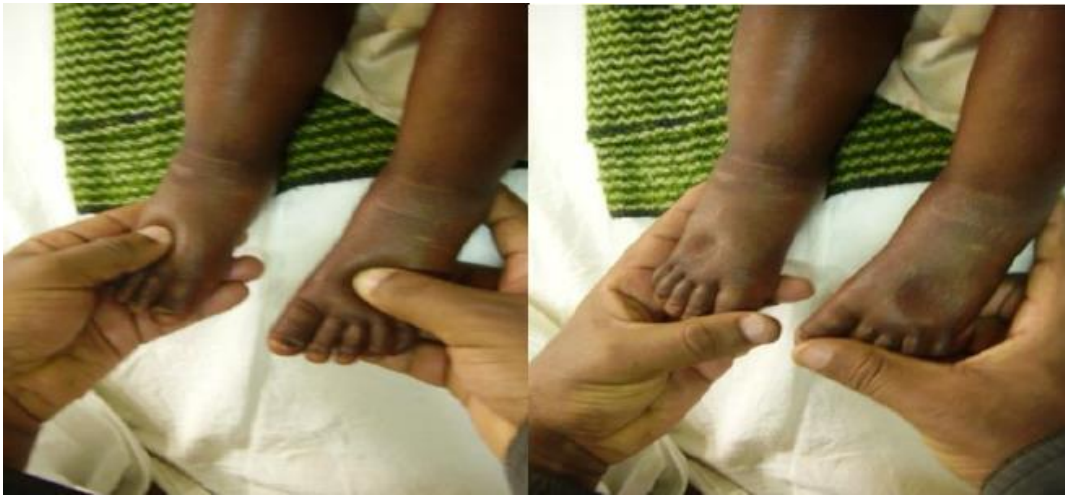

ENFANT  
MALNUTRITION  
AIGUE SEVERE

## Sévérité des oedèmes Codification

- **Œdèmes Légers +** : des 2 pieds +
- **Œdèmes Modérés ++** : des 2 pieds et la partie inférieure des 2 jambes, ou les 2 mains et la partie inférieure des 2 avant-bras. Intermédiaire entre le degré d'oedèmes légers et sévères
- **Œdèmes Sévères+++** : généralisés soit incluant les 2 pieds, jambes, mains, bras et le visage

# PRENDRE LE POIDS

---

Avec la balance électronique double poids

1. Enfant qui peut marcher, directement sur la balance

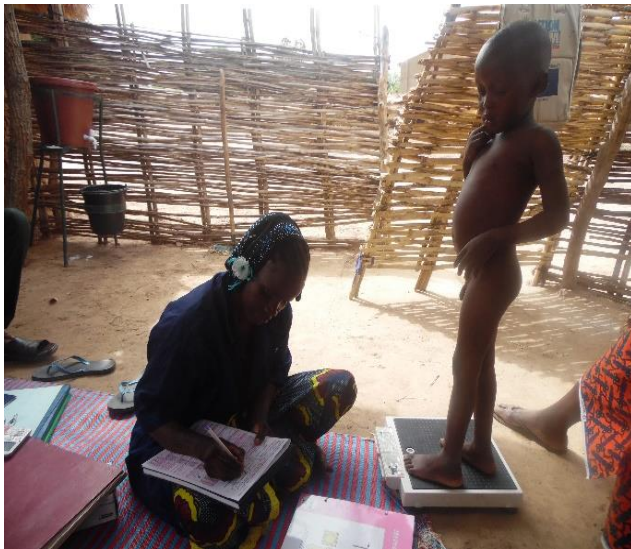

# PRENDRE LE POIDS

Avec la balance électronique double poids

2. Enfant qui ne marche pas

Mettre la balance en  
marche

Prendre le poids de la  
mère

Mettre la balance à 0, la  
mère étend sur la balance

Donner l'enfant à la  
mère

Marquer le poids qui se  
trouve sur l'écran

Figure 4 Measurement techniques  
for child weight

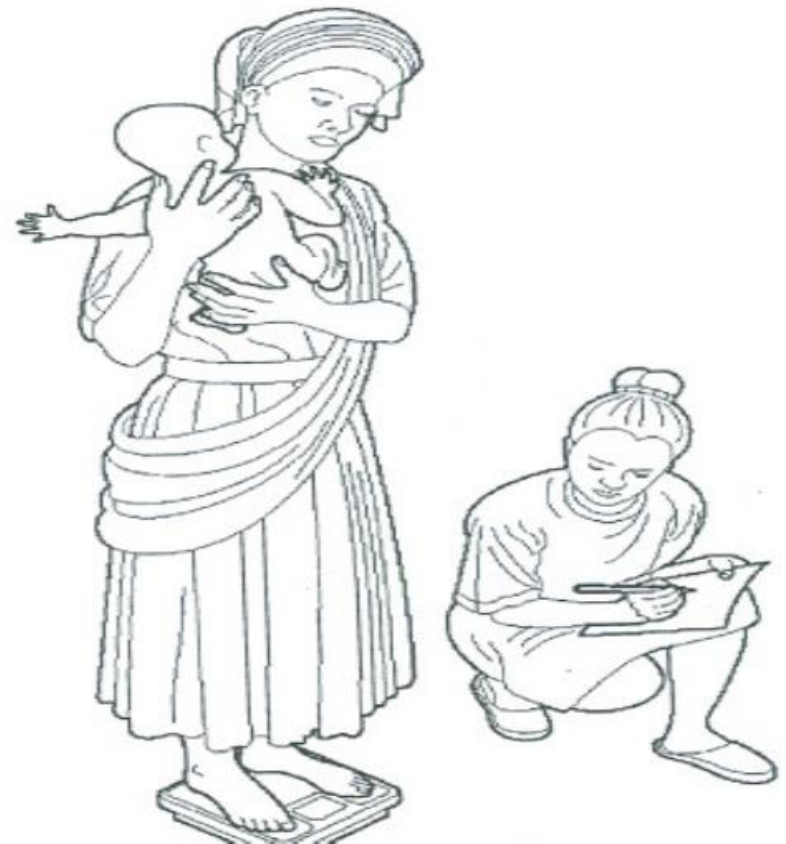

# PRENDRE LE POIDS

---

Avec la balance salter

1. Regarder directement le numero

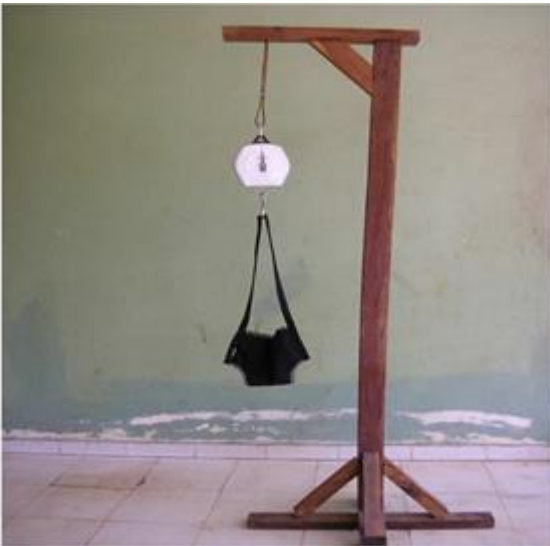

# TEST DE L'APPÉTIT

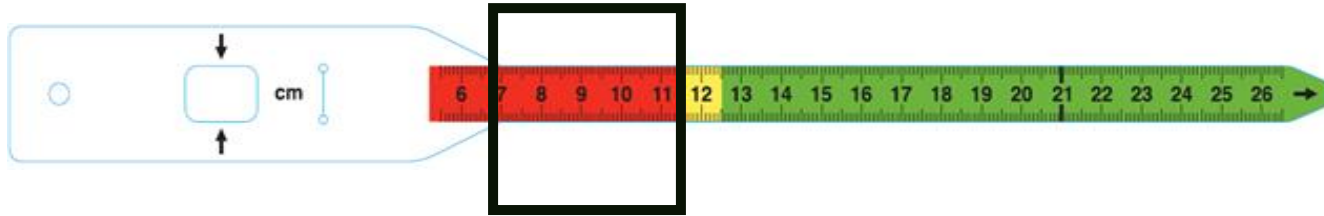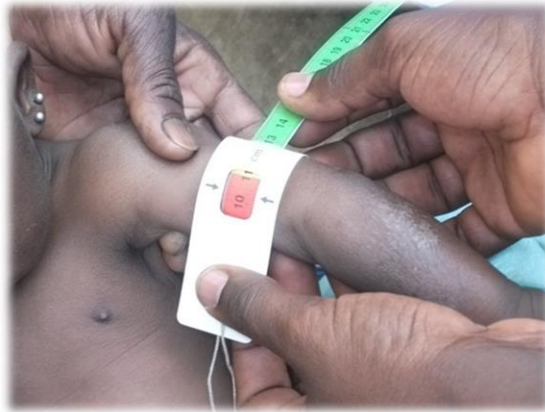

Faire le test de l'appétit à tout enfant avec une malnutrition aigüe sévère ou avec un MUAC rouge

ENFANT  
MALNUTRITION  
AIGUE SEVERE

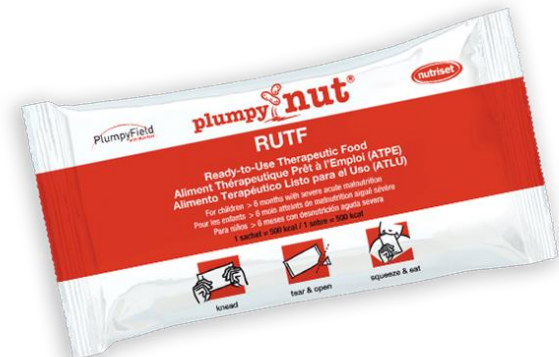

# TEST DE L'APPÉTIT

---

Trouver un endroit  
calme et un peu à  
l'écart

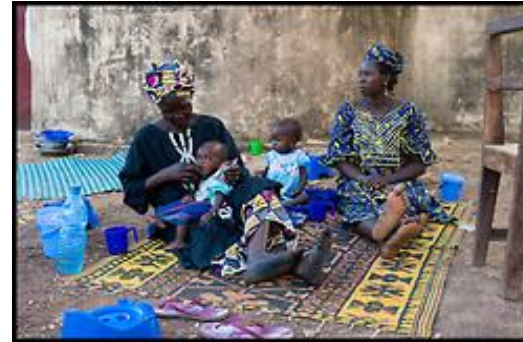

Demander à l'accompagnant  
de laver les mains ainsi que  
celles de son enfant

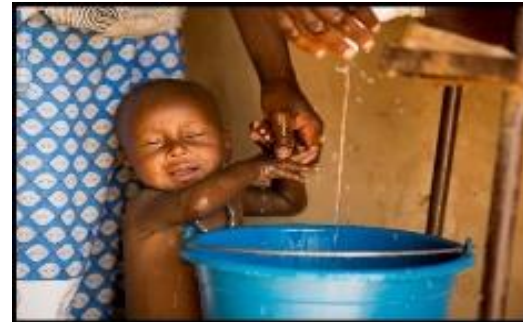

Donner l'ATPE  
directement avec le  
sachet, accompagné  
d'un verre/tasse d'eau  
potable

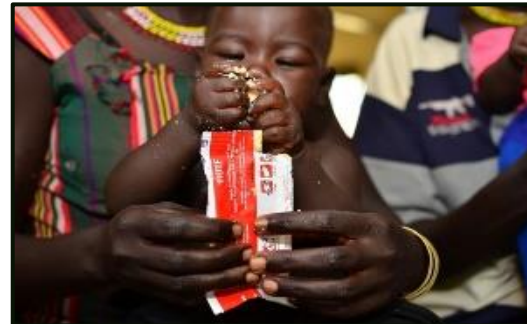



# TEST DE L'APPÉTIT

---

LAVER BIEN LES MAINS DE L'ENFANT  
ET AUSSI DE LA MÈRE AU  
ACCOMPAGNANTE

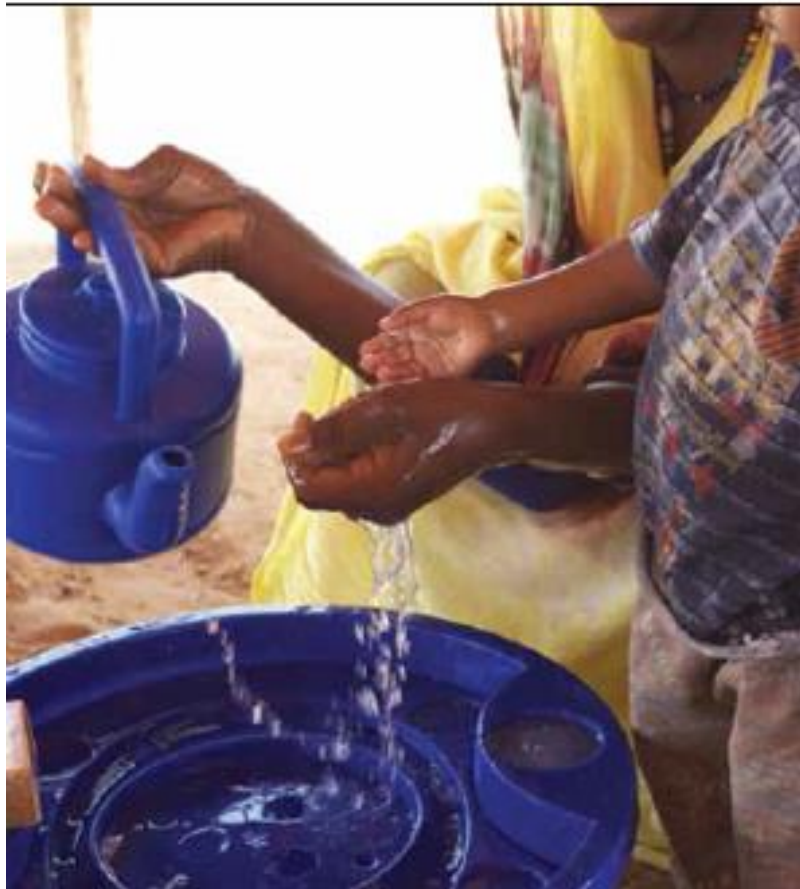

PENDANT LA DURÉE DU TEST DE  
L'APPÉTIT L'ENFANT DOIT AUSSI  
BOIRE DE L'EAU POTABLE

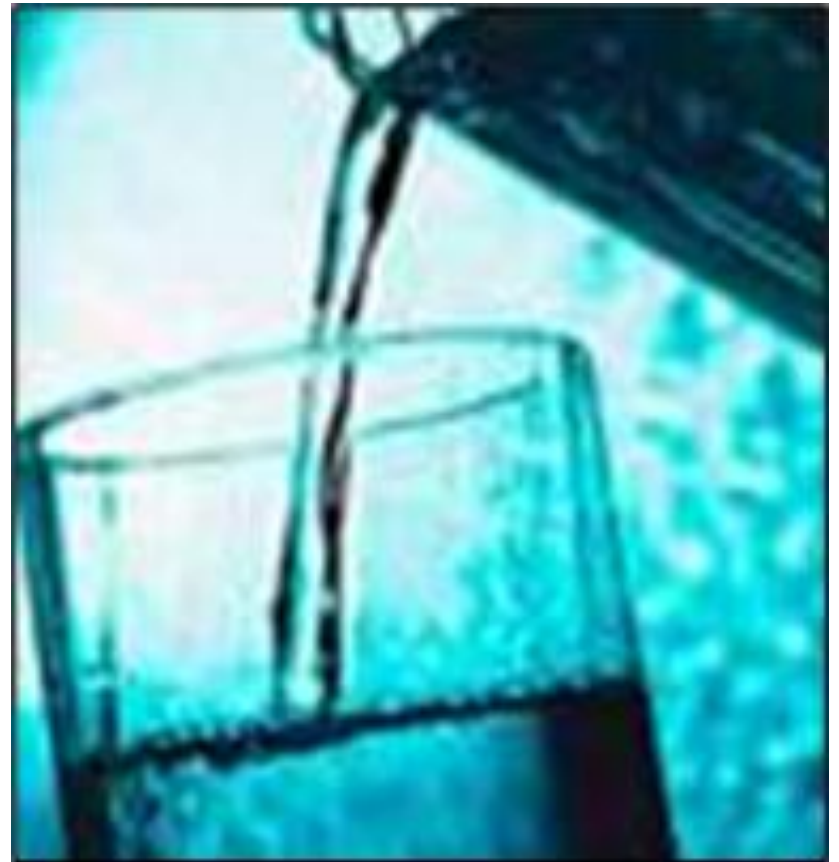

# TEST DE L'APPÉTIT

| Poids en Kg      | Test de l'appétit bon            | Matériel                                    |
|------------------|----------------------------------|---------------------------------------------|
| Moins 4<br>- 6.9 | $\frac{1}{4}$ ou plus du contenu | Verre de thé n°8 gradué en 4 parties égales |
| 7 - 9.9          | $\frac{1}{3}$ ou plus du contenu | Verre de thé n°8 gradué en 3 parties égales |
| 10 -<br>14.9     | $\frac{1}{2}$ ou plus du contenu | Verre de thé n°8 gradué en 2 parties égales |

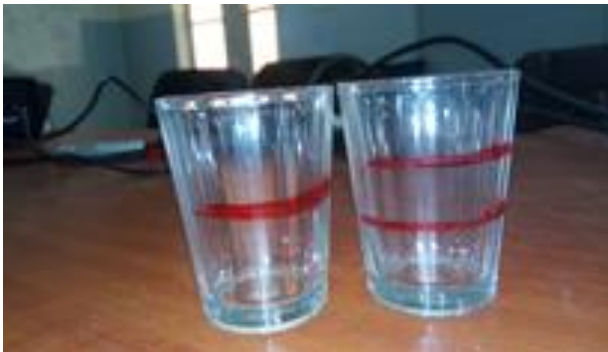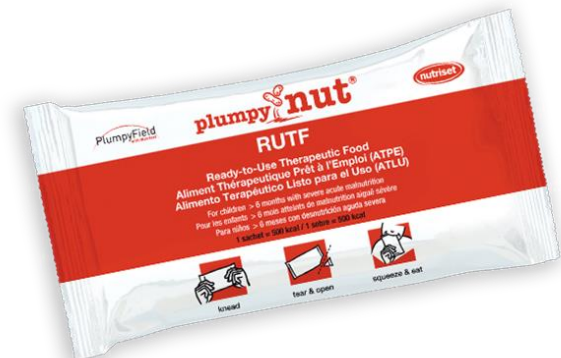



# TEST DE L'APPÉTIT

| Poids en Kg          | Faible        | Bon          |
|----------------------|---------------|--------------|
| <b>Moins 4 - 6.9</b> | < 1/ 4 sachet | > 1/3 sachet |
| <b>7 - 9.9</b>       | < 1/3 sachet  | > 1/2 sachet |
| <b>10 - 14.9</b>     | < 1/ 2 sachet | > 3/4 sachet |



# CRITÈRES D'ADMISSION

---

| Type d'admission                   | Critères                                                                                                                                                                                                             |
|------------------------------------|----------------------------------------------------------------------------------------------------------------------------------------------------------------------------------------------------------------------|
| Nouvelle admission                 | <ul style="list-style-type: none"><li>• Age entre 6 -59 mois</li><li>• PB rouge</li><li>• P/T &lt; -3</li><li>• Appétit bon</li><li>• Œdèmes bilatéraux +, ++</li><li>• Absence d'autres signes de dangers</li></ul> |
| Réadmission après abandon < 2 mois | <ul style="list-style-type: none"><li>• Retour au site ASC/Case de santé dans les 2 mois après l'abandon du traitement</li></ul>                                                                                     |

# CAS D'ADMISSION

PB rouge

Sans  
complications  
**médicales**

Œdèmes  
bilatéraux  
+,++

Test appétit  
bon

Admis MAS

PB jeune

Admis MAM

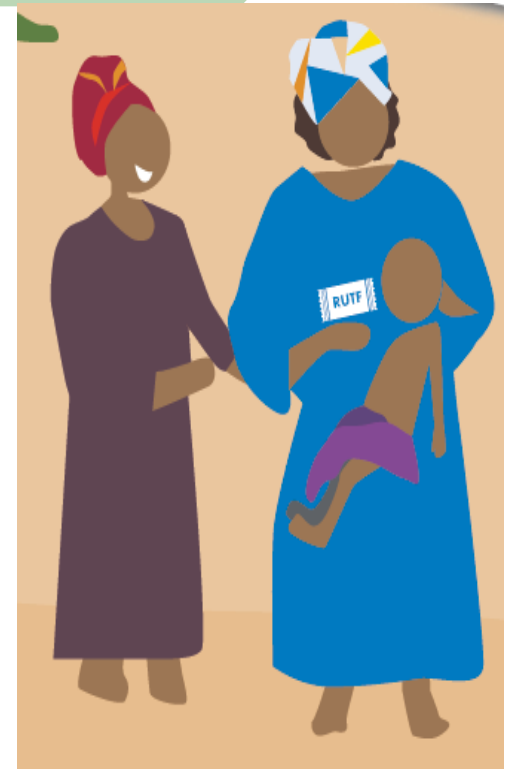

# CAS DE RÉFÉRENCEMENT

Enfant

PB rouge

OEdèmes  
bilatéraux  
+++

Test  
appétit  
faible

Référer

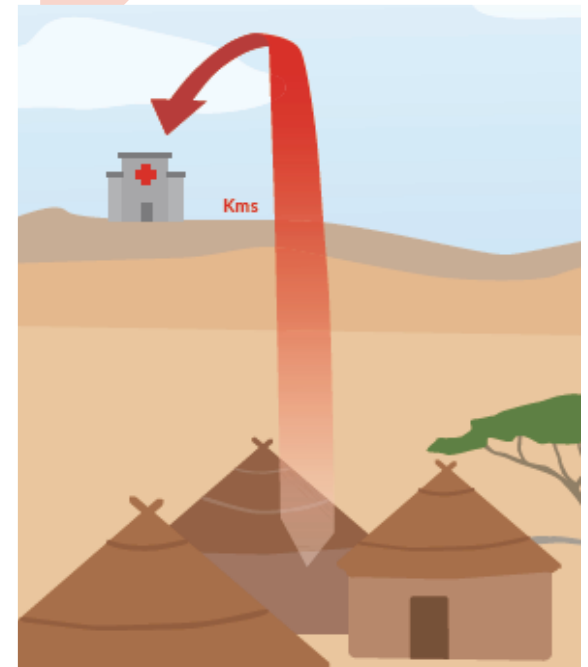

# MESSAGES CLÉS

---

| Question                                                                                                    | Réponse                                                                                                                                                                                                                    |
|-------------------------------------------------------------------------------------------------------------|----------------------------------------------------------------------------------------------------------------------------------------------------------------------------------------------------------------------------|
| 1. Quels sont les matériels que l'ASC doit-il avoir pour identifier une malnutrition aigüe chez un enfant ? | <ul style="list-style-type: none"><li>• Disponibilité d'un dispositif l'eau pour se lavage des mains au savon</li><li>• Disponibilité de l'eau potable pour boire</li><li>• Balance</li><li>• Périmètre brachial</li></ul> |
| 2. Comment faire le test de l'appétit                                                                       | <ul style="list-style-type: none"><li>• Endroit calme</li><li>• Laver les mains de l'enfant</li><li>• Donner ATPE avec beaucoup de l'eau potable</li></ul>                                                                 |
| 3. Comment identifier un enfant avec une malnutrition aigüe severe sans complications                       | <ul style="list-style-type: none"><li>• PB rouge</li><li>• Oedèmes bilatéraux +,++</li><li>• Test de l'appétit</li></ul>                                                                                                   |

# QUESTIONS RAPIDES

---

| L'enfant présente-t-il la malnutrition aigüe sévère ?                  | Oui | Non | Référer l'enfant | Admis |
|------------------------------------------------------------------------|-----|-----|------------------|-------|
| Sam – PB rouge, sans complications médicales, test de l'appétit faible | X   |     | X                |       |
| Hassane- PB vert, 2 mois, vomit tout ce qu'il ingère                   |     | X   | X                |       |
| Murat -sans œdèmes, PB rouge, test de l'appétit bon                    | X   |     |                  | X     |
| La Beauté –PB jaune, avec toux depuis deux jours                       |     | X   |                  | X     |
| Marco – œdèmes bilatéraux , PB rouge, diarrhée plus de 2 semaines      | X   |     |                  | X     |
| Aminou- œdèmes bilatéraux , PB jaune, toux depuis 1 semaine            |     | X   |                  | X     |
| Salimata- PB rouge, test appétit bon, fièvre depuis 2 jours            | X   |     |                  | X     |

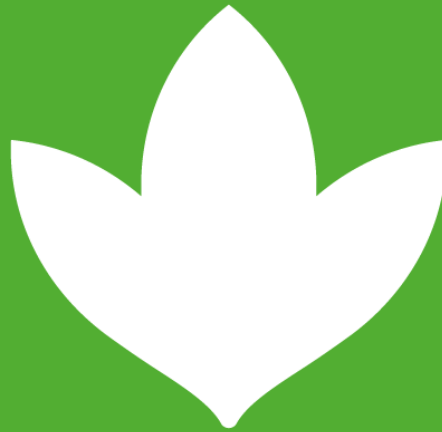

Insérez votre site web

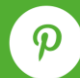

# MODULE 3

## TRAITEMENT DE L'ENFANT SOUFFRANT DE MALNUTRITION AIGÛE SÉVÈRE SANS COMPLICATIONS MÉDICALES

Module de Formation des Agents de Santé  
Communautaire sur le Protocole PCIMA

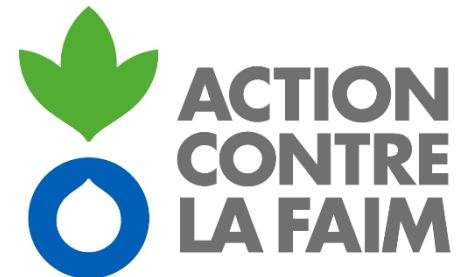



# OBJECTIFS DU MODULE 3

---

A la fin de ce module, l'agent de santé communautaire (ASC) doit être capable de:

1. Administrer le traitement systématique aux enfants malnutris aigüe sévère sans complications médicales
2. Administrer le traitement nutritionnel MAM et MAS

# CE DONT L'ASC A BESOIN

---



**La disponibilité d'un dispositif de lavage des mains au savon**



**Un thermomètre**



**Une balance**



**Une Bande de Shakir ou MUAC**

# TRAITEMENT

---

| TRAITEMENT<br>NUTRITIONNEL | MALNUTRITION AIGUE                |                                                  |
|----------------------------|-----------------------------------|--------------------------------------------------|
|                            | MAM<br>Sachet par semaine<br>ASPE | MAS<br>Sachet par semaine<br>ATPE                |
| 3,0 – 3,4 Kg               | 7 sachet/semaine                  | 8 sachet /semaine                                |
| 3,5 – 4,9 Kg               |                                   | 10 sachet /semaine                               |
| 5.0 – 6.9 Kg               |                                   | 15 sachet /semaine                               |
| 7.0 – 9.9 Kg               |                                   | 20 sachet /semaine                               |
| TRAITEMENT<br>SYSTEMATIQUE |                                   | Amoxicilline,<br>mebendazol, vaccine<br>rougeole |

# A L'ADMISSION. SEMAINE 1.MAS

|                                                                                                | Amoxicilline comprimé 250 mg                                                               |                                                                                             |
|------------------------------------------------------------------------------------------------|--------------------------------------------------------------------------------------------|---------------------------------------------------------------------------------------------|
| Poids                                                                                          | <br>Matin | <br>Soir |
| <5kg<br>      |           |          |
| 5-10 Kg<br>   |           |          |
| 10-20 kg<br> |         |         |
| 20-35 kg                                                                                       |        |        |
| > 35 Kg                                                                                        |        |        |

# SEMAINE 2. MAS

---

Déparasitage, seulement pour les enfants qui peuvent marcher

| 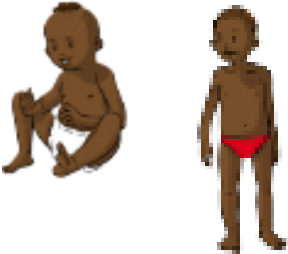 | < 1 an             | 1-2 ans                                                                              | > = 2 ans                                                                            |
|-----------------------------------------------------------------------------------|--------------------|--------------------------------------------------------------------------------------|--------------------------------------------------------------------------------------|
| <b>Albendazole</b><br>400 mg                                                      | Ne pas administrer |   |   |
| <b>Mébendazole</b><br>500 mg                                                      | Ne pas administrer |  |  |

# SEMAINE 4. MAS

---

Vérifier si l'enfant a reçu le vaccin anti- rougeoleux

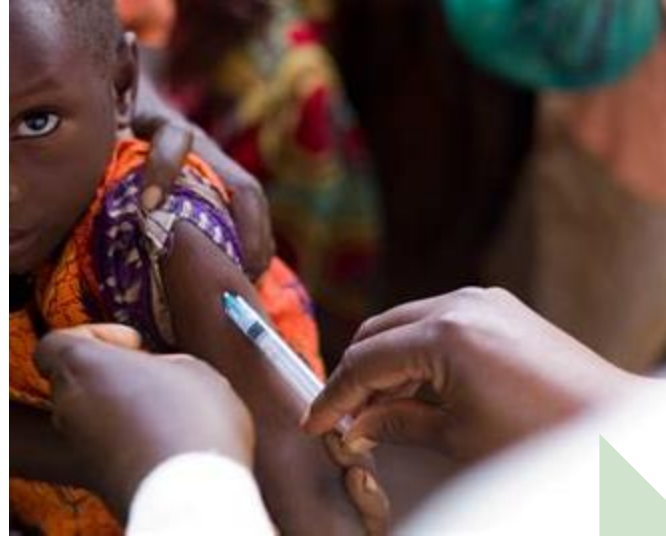

**Enfant à la 4ème  
visite**

**Pas vacciné  
contre la rougeole**

**Contacter/référer  
l'équipe mobile du  
centre de santé**

# CHAQUE SEMAINE.MAS

---

Enfant avec  
**une fièvre**

Prendre la  
**température**

Test  
diagnostique  
rapide +

Donner du  
**Coartem**

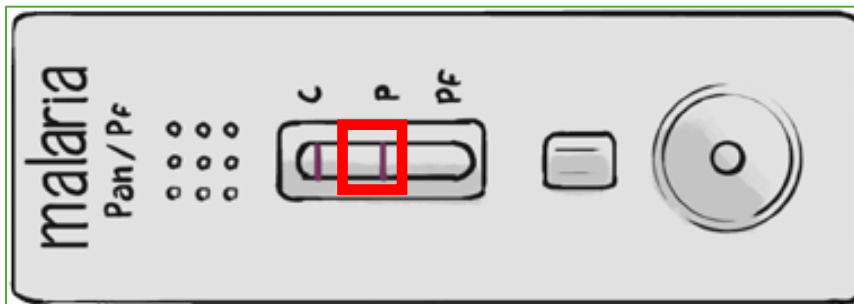

# CHAQUE VISITE SI TDR +

COARTEM

---

|          |                                                                                                                                                                     |                                                                                                                                                                     |                                                                                                                                                                        |                                                                                                                                                                         |                                                                                                                                                                         |                                                                                                                                                                         |
|----------|---------------------------------------------------------------------------------------------------------------------------------------------------------------------|---------------------------------------------------------------------------------------------------------------------------------------------------------------------|------------------------------------------------------------------------------------------------------------------------------------------------------------------------|-------------------------------------------------------------------------------------------------------------------------------------------------------------------------|-------------------------------------------------------------------------------------------------------------------------------------------------------------------------|-------------------------------------------------------------------------------------------------------------------------------------------------------------------------|
|          | COARTEM 1 (COMPRIME = 20 mg AM et 120 mg LM)                                                                                                                        |                                                                                                                                                                     |                                                                                                                                                                        |                                                                                                                                                                         |                                                                                                                                                                         |                                                                                                                                                                         |
| Poids    | Jour1                                                                                                                                                               |                                                                                                                                                                     | Jour2                                                                                                                                                                  |                                                                                                                                                                         | Jour3                                                                                                                                                                   |                                                                                                                                                                         |
| < 14kg   |                                                                                    |                                                                                    |                                                                                      |                                                                                      |                                                                                      |                                                                                      |
| 14-25 kg |   |   |   |   |   |   |



# CHAQUE VISITE SI TDR +

## COARTEM

---

|        | COARTEM<br>(Suspension 5 ml=15 mg AM + 90 mg LM) |       |       |
|--------|--------------------------------------------------|-------|-------|
| Poids  | Jour1                                            | Jour2 | Jour3 |
| 5kg    | 7 ml                                             | 7 ml  | 7 ml  |
| 7.5 kg | 10 ml                                            | 10 ml | 10 ml |
| 10 kg  | 14 ml                                            | 14 ml | 14 ml |
| 15 kg  | 20 ml                                            | 20 ml | 20 ml |

# CHAQUE SEMAINE. MAS

|                                                                                                | ATPE                                                                                   |                                                                                          |
|------------------------------------------------------------------------------------------------|----------------------------------------------------------------------------------------|------------------------------------------------------------------------------------------|
| Poids                                                                                          | sachet par jour                                                                        | sachet par semaine                                                                       |
| 3,0 – 3,4 Kg  | 1 ¼  | 8     |
| 3,5 – 4,9 Kg                                                                                   | 1 ½  | 10    |
| 5.0 – 6.9 Kg  | 2    | 15    |
| 7.0 – 9.9 Kg  | 3    | 20    |
| 10.0 – 14.9 Kg                                                                                 | 4    | 30    |
| 15.0 – 19.9 Kg                                                                                 | 5   | 35   |
| 20.0 – 29.9 Kg                                                                                 | 6  | 40  |
| 30.0 – 39.9 Kg                                                                                 | 7  | 50  |
| 40 – 60 Kg                                                                                     | 8  | 55  |

# CHAQUE SEMAINE. MAS

|                                                                                                | ATPE                                                                                   |                                                                                          |
|------------------------------------------------------------------------------------------------|----------------------------------------------------------------------------------------|------------------------------------------------------------------------------------------|
| Poids                                                                                          | sachet par jour                                                                        | sachet par semaine                                                                       |
| 3,0 – 3,4 Kg  | 1 ¼  | 8     |
| 3,5 – 4,9 Kg                                                                                   | 1 ½  | 10    |
| 5.0 – 6.9 Kg  | 2    | 15    |
| 7.0 – 9.9 Kg  | 3    | 20    |
| 10.0 – 14.9 Kg                                                                                 | 4    | 30    |
| 15.0 – 19.9 Kg                                                                                 | 5   | 35   |
| 20.0 – 29.9 Kg                                                                                 | 6  | 40  |
| 30.0 – 39.9 Kg                                                                                 | 7  | 50  |
| 40 – 60 Kg                                                                                     | 8  | 55  |

# MESSAGES CLÉS

---

| Question                                                                                                    | Réponse                                                                                                                                                                                                                                      |
|-------------------------------------------------------------------------------------------------------------|----------------------------------------------------------------------------------------------------------------------------------------------------------------------------------------------------------------------------------------------|
| 1. Quelles sont les médicaments que l'ASC doit-il avoir pour les enfants MAS sans complications médicales ? | <ul style="list-style-type: none"><li>• Amoxicilline</li><li>• Paracétamol</li><li>• Mebendazole/albendazole</li><li>• Coartem</li></ul>                                                                                                     |
| 2. Comment calcule -t-on les quantités d'ATPE à donner à l'enfant?                                          | <ul style="list-style-type: none"><li>• Avec le poids</li></ul>                                                                                                                                                                              |
| 3. Conseils à la mère pour prendre l'ATPE à la maison                                                       | <ul style="list-style-type: none"><li>• Toujours allaiter avant de donner l'ATPE</li><li>• Lavage les mains de l'enfant au savon</li><li>• Prendre beaucoup d'eau potable</li><li>• Ne pas partager l'ATPE avec les autres enfants</li></ul> |

# QUESTIONS RAPIDES

|                                                                                                                      | Vrai | Faux |
|----------------------------------------------------------------------------------------------------------------------|------|------|
| Sam – PB rouge, sans complications médicales. L' ASC lui a donné Coartem à l'admission                               |      | X    |
| Hassane- PB rouge sans complications, sans fièvre, l'ASC lui a donné amoxicilline et ATPE le jour de l'admission     | X    |      |
| Murat –PB rouge sans complications, avec fièvre et TDR+, l'ASC a donné du coartem et ATPE à la 3ème semaine du suivi | X    |      |
| La Beauté – PB rouge, test de l'appétit faible. L'ASC a donné 10 sachets de ATPE à la troisième visite               |      | X    |
| Marco – A la semaine 4, l'enfant avec malnutrition aigüe, doit recevoir le vaccin contre la tuberculose              |      | X    |
| Rosine- PB rouge, à partir de la 5 ème semaine a partagé l'ATPE avec sa petite soeur                                 |      | X    |
| Aminou- durant toute la durée du traitement de la MAS a reçu amoxicilline, mebendazole et ATPE                       | X    |      |
| Salimata-PB rouge, 2ème visite pour le suivi, l'ASC lui a donné du mebenadazole et ATPE                              | X    |      |



Insérez votre site web

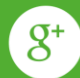

# MODULE 4

## SUIVI HEBDOMADAIRE DE L'ENFANT SOUFFRANT DE MALNUTRITION AIGUE

Module de Formation des Agents de Santé  
Communautaire sur le Protocole PCIMA



# OBJECTIFS DU MODULE 4

---

A la fin de ce module, l'agent de santé communautaire (ASC) doit être capable de:

1. Connaître les actions et traitement qu'il faut faire a chaque visite
2. Identifier quand il faut référer l'enfant
3. Conseilles à la mère



# CE DONT L'ASC A BESOIN

---

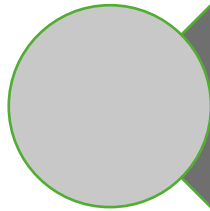

**la disponibilité d'un  
dispositif lavage des mains au  
savon**

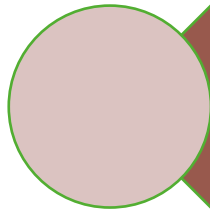

**Un thermomètre**

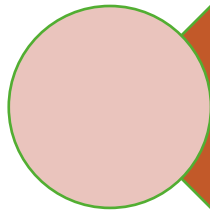

**Une balance**

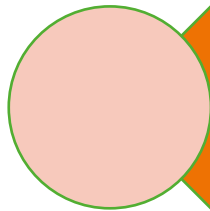

**Une Bande de Shakir ou MUAC**

# LAVAGE DES MAINS AU SAVON

---

L'ASC doit se laver les mains avec du savon

1. Avant de toucher l'enfant,
2. Après avoir touché l'enfant
3. Après avoir salué la mère ou l'accompagnant
4. Avant d'effectuer toute intervention de nettoyage ou d'aseptique,
5. Après exposition aux fluides corporels ( urines, sang)

# SUIVI DE L'ENFANT À CHAQUE VISITE

---

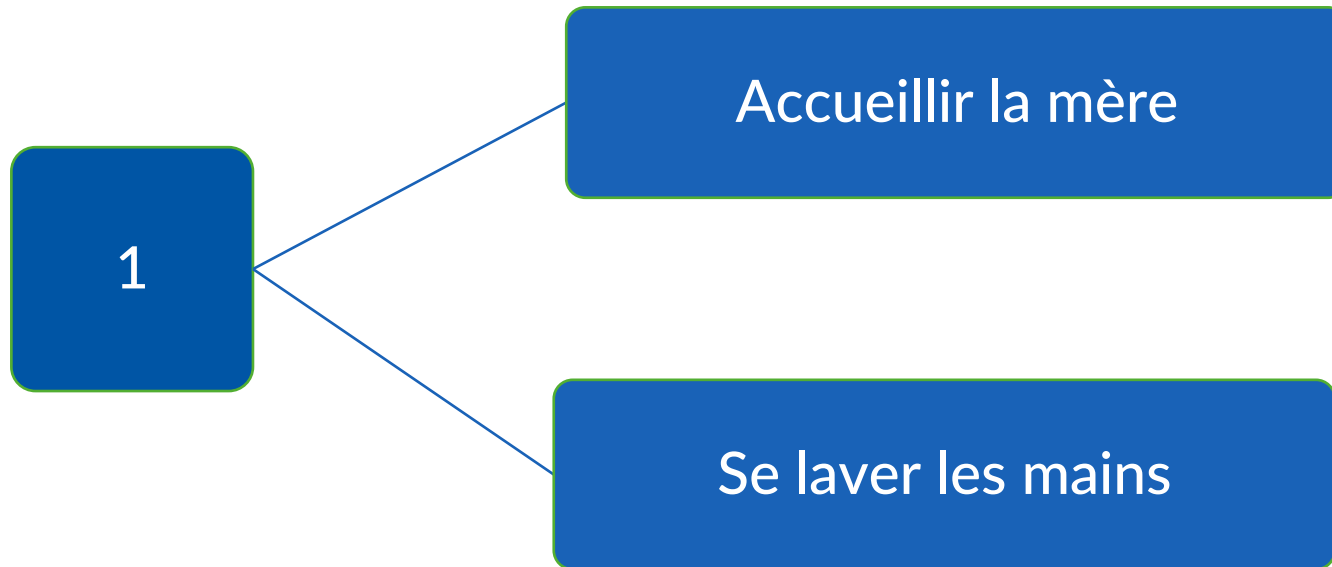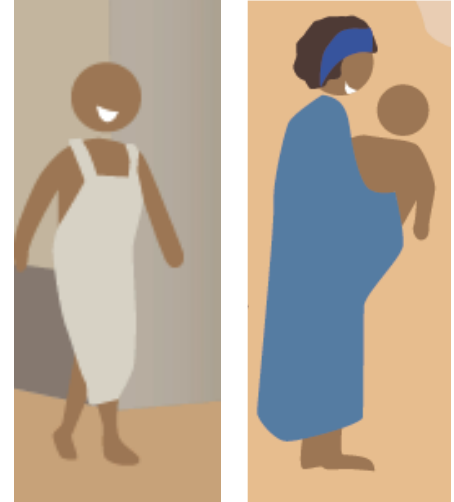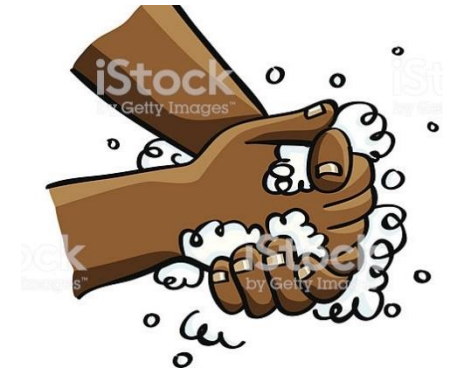

# SUIVI DE L'ENFANT À CHAQUE VISITE

---

2

Identifier **les signes de** danger (Module 1)

Ecouter la mère

Observer l'enfant

Examen physique de l'enfant

# SUIVI DE L'ENFANT À CHAQUE VISITE

3

Mesures anthropométriques (Module 2)

Mesure  
PB

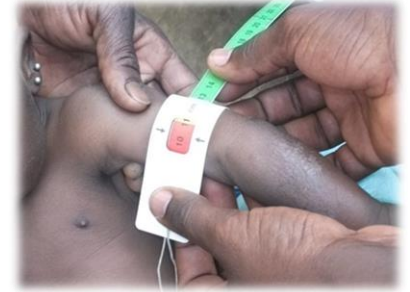

Prendre le  
Poids

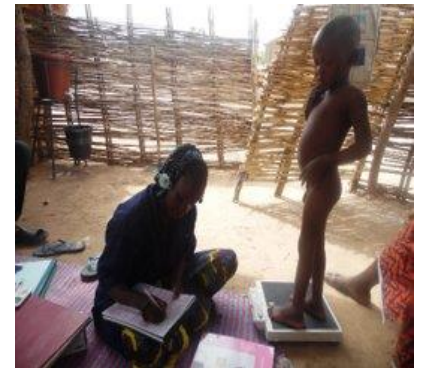

Recherche d  
es œdèmes  
bilatéraux

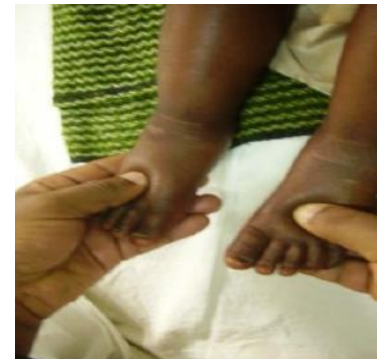

# SUIVI DE L'ENFANT À CHAQUE VISITE

---

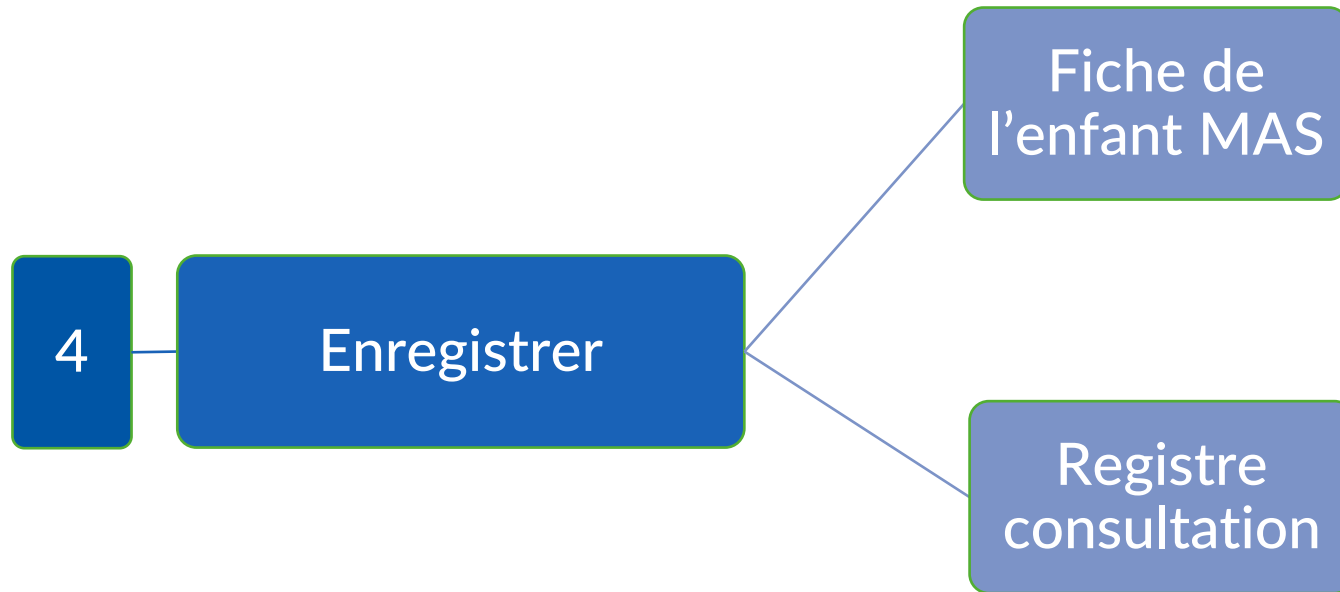

# ARBRE DE DÉCISION

---

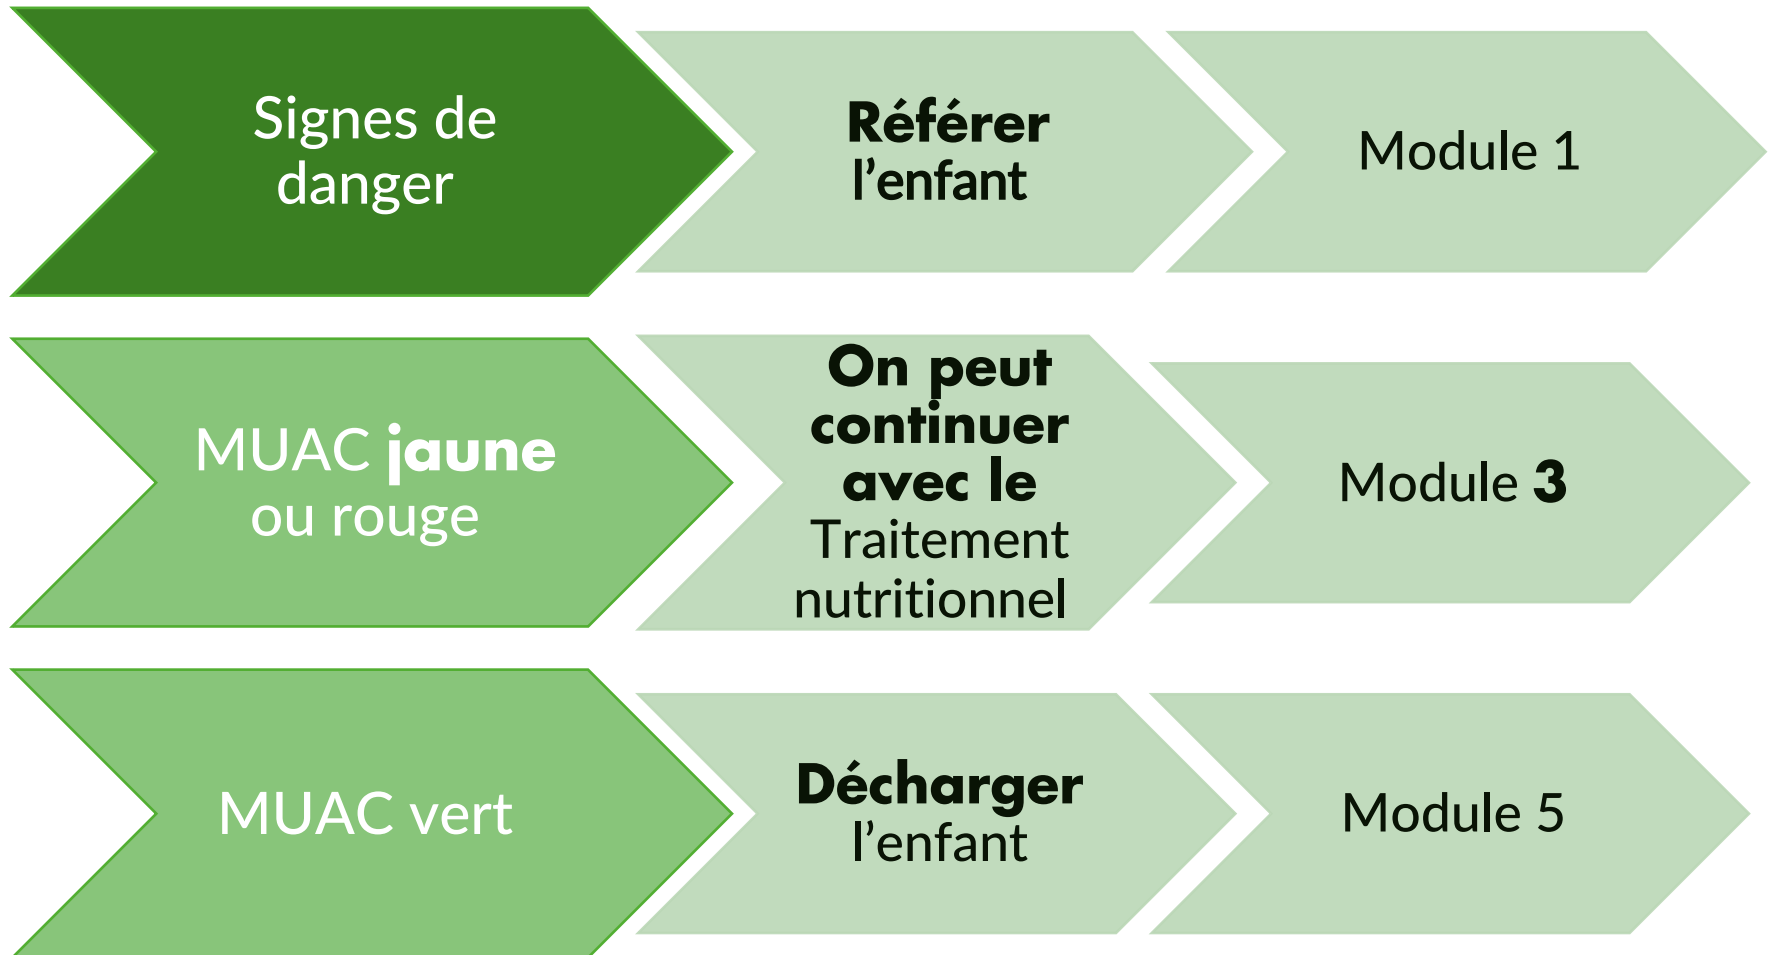

# SUIVI ENFANT MAM

---

1. Suivi tous les 15 jours
2. Suivi avec le poids et PB a chaque visite
3. Mebendazol la première visite
4. 14 sachet de ASPE a chaque visite



# SUIVI HEBDOMADAIRE MAS

|                         | Sem 1<br>Adm                                                                                 | Sem 2                                                                                             | Sem 3                                                                             | Sem 4                                                                                                     | Sem 5                                                                               | Sem 6                                                                               | Sem 7                                                                               | Sem 8                                                                               |
|-------------------------|----------------------------------------------------------------------------------------------|---------------------------------------------------------------------------------------------------|-----------------------------------------------------------------------------------|-----------------------------------------------------------------------------------------------------------|-------------------------------------------------------------------------------------|-------------------------------------------------------------------------------------|-------------------------------------------------------------------------------------|-------------------------------------------------------------------------------------|
| Signes de danger        |             |                  |  |                        |  |  |  |  |
| PB                      |             |                  |  |                        |  |  |  |  |
| Poids                   |             |                  |  |                        |  |  |  |  |
| Test appetit            |             | A toute visite s'il y a poids et/ou PB stationnaire                                               |                                                                                   |                                                                                                           |                                                                                     |                                                                                     |                                                                                     |                                                                                     |
| Traitement nutritionnel |             |                  |  |                        |  |  |  |  |
| Traitement systematique | Amoxi<br> | Mebendazol<br> |                                                                                   | Vaccine rougeole<br> |                                                                                     |                                                                                     |                                                                                     |                                                                                     |
| TDR, coartem            | A toute visite s'il y a la fièvre, on fait le TDR, si TDR+, coartem                          |                                                                                                   |                                                                                   |                                                                                                           |                                                                                     |                                                                                     |                                                                                     |                                                                                     |

# CONSEILS CHAQUE VISITE MAS

---

1. Sensibiliser la mère que l'enfant doit toujours être **allaité** et à la demande avant qu'on lui donne des ATPE
2. L'**ATPE** est une nourriture et un **médicament** destiné exclusivement aux enfant malnutris, à ne pas partager aux autres enfants à la famille
3. L'enfant ne doit jamais être forcé à manger

# CONSEILS CHAQUE VISITE. MAS

---

5. Laver les mains de l'enfant ainsi que son visage avec du savon avant de le nourrir et donner l'ATPE
6. L'enfant doit prendre l'ATPE avec beaucoup d'eau potable

# QUESTIONS RAPIDES

---

| Question                                                      | Réponse                                                                                                                                                                                                                                      |
|---------------------------------------------------------------|----------------------------------------------------------------------------------------------------------------------------------------------------------------------------------------------------------------------------------------------|
| 1. Quelles sont les actions qu'il faut faire a chaque visite? | <ul style="list-style-type: none"><li>• Identifier signes de danger</li><li>• Poids, PB et œdèmes</li><li>• Test de l'appétit s'il n'y a pas l'augmentation de poids</li><li>• TDR s'il y a fièvre</li></ul>                                 |
| 2. A quels moments l'ASC doit faire le test de l'appétit      | A la première visite, et toujours s'il n'y a pas l'augmentation du poids et/ou PB                                                                                                                                                            |
| 3. Quelles sont les conseils a donner à mère?                 | <ul style="list-style-type: none"><li>• Toujours allaiter avant de donner l'ATPE</li><li>• Lavage les mains de l'enfant au savon</li><li>• Prendre beaucoup d'eau potable</li><li>• Ne pas partager l'ATPE avec les autres enfants</li></ul> |

# CAS PRATIQUE

---

|                                                                            | Oui | Non |
|----------------------------------------------------------------------------|-----|-----|
| Sam – arrive pour la deuxième visite de suivi. On lui donne l'amoxiciline. |     | X   |
| Hassane- PB rouge                                                          |     | X   |
| Murat -sans œdèmes, PB rouge, test de l'appétit bon                        | X   |     |
| La beauté –PB jaune, avec toux depuis deux jours                           |     | X   |
| Marco – œdèmes bilatéraux , PB rouge, diarrhée plus de 2 semaines          | X   |     |
| Aminou- œdèmes bilatéraux , PB jaune, toux depuis 1 semaine                |     | X   |
| Salimata- PB rouge, test appétit bon, fièvre depuis 2 jours                | X   |     |



Insérez votre site web



# MODULE

# 5

## PROCEDURES DE DÉCHARGE DE L'ENFANT ET CONSEILS NUTRITIONNELS

Module de Formation des Agents de Santé  
Communautaire sur le Protocole PCIMA



# OBJECTIFS DU MODULE 5

---

A la fin de ce module, l'agent de santé communautaire (ASC) doit être capable de:

1. Maîtriser les critères de sortie de l'enfant au programme
2. Donner des Conseils nutritionnels aux mères et/ou accompagnantes



# CE DONT L'ASC A BESOIN

---

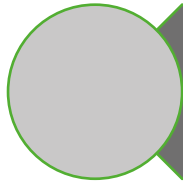

**La disponibilité d'un dispositif  
de lavage des mains au savon**

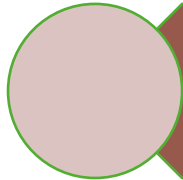

**Un thermomètre**

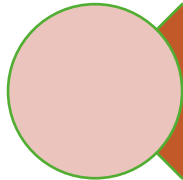

**Une balance**

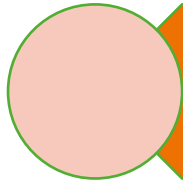

**Une Bande de Shakir ou MUAC**

# LAVAGE DES MAINS AU SAVON

---

L'ASC doit se laver les mains avec du savon

1. Avant de toucher l'enfant,
2. Après avoir touché l'enfant
3. Après avoir salué la mère ou l'accompagnant
4. Avant d'effectuer toute intervention de nettoyage ou aseptique,
5. Après exposition aux fluides corporels ( urines, sang)

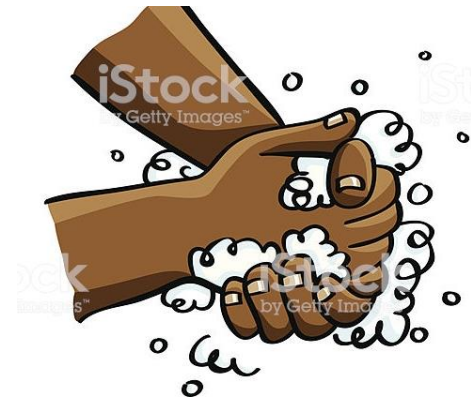

# CRITÈRES DE SORTIE MAM

---

|                    |                                                                                                                                                                                                                                |
|--------------------|--------------------------------------------------------------------------------------------------------------------------------------------------------------------------------------------------------------------------------|
| <b>Guérison</b>    | PB supérieur ou égal à 125 mm ( PB vert) pendant 2 visites consécutives<br>$P/T > 1,5$                                                                                                                                         |
| <b>Abandon</b>     | L'enfant n'est pas venu pendant 2 visites consécutives (1 mois)                                                                                                                                                                |
| <b>Non réponse</b> | <ul style="list-style-type: none"><li>• Non atteinte des critères de sortie après 3 mois</li><li>• Absence de gain de poids après 6 semaines ;</li><li>• Perte de poids pendant plus de 4 semaines dans le programme</li></ul> |

# CRITÈRES DE SORTIE MAS

## Guérison

PB supérieur ou égal à 125 mm ( PB vert)  
pendant 2 visites consécutives  
 $P/T > 1,5$   
Et  
Absence d'œdèmes  
nutritionnels pendant 14 jours

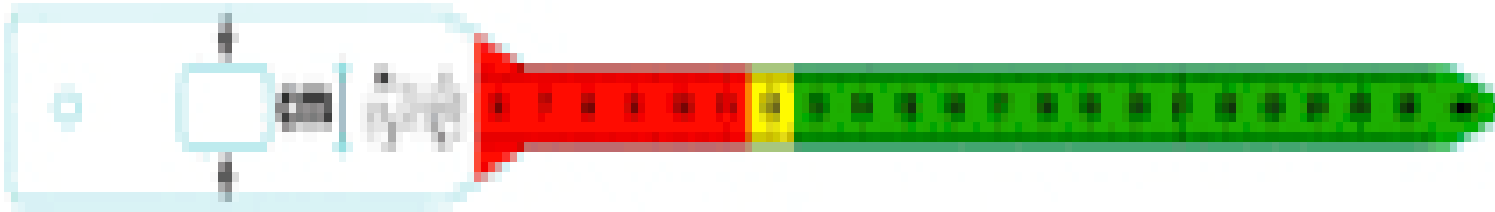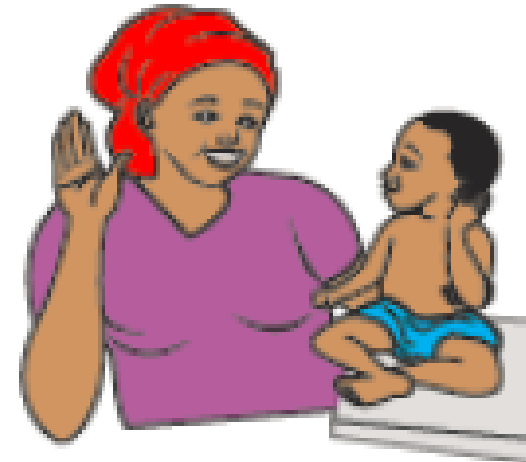

# TYPE DE SORTIE MAS

---

|                  |                                                                                                                          |
|------------------|--------------------------------------------------------------------------------------------------------------------------|
|                  |                                                                                                                          |
| <b>Guéri</b>     | Enfant avec PB vert                                                                                                      |
| <b>Abandon</b>   | L'enfant n'est pas venu pendant 2 visites consécutives                                                                   |
| <b>Référence</b> | Référence vers le CRENI pour non réponse au traitement ou signes de danger                                               |
| <b>Décès</b>     | Enfant qui est décédé durant le traitement avec l'ASC                                                                    |
| <b>Transfert</b> | Transfert vers un autre site de distribution CRENAS (il ne reviendra pas mais est toujours enregistré dans le programme) |

# NON RÉPONSE AU TRAITEMENT MAS

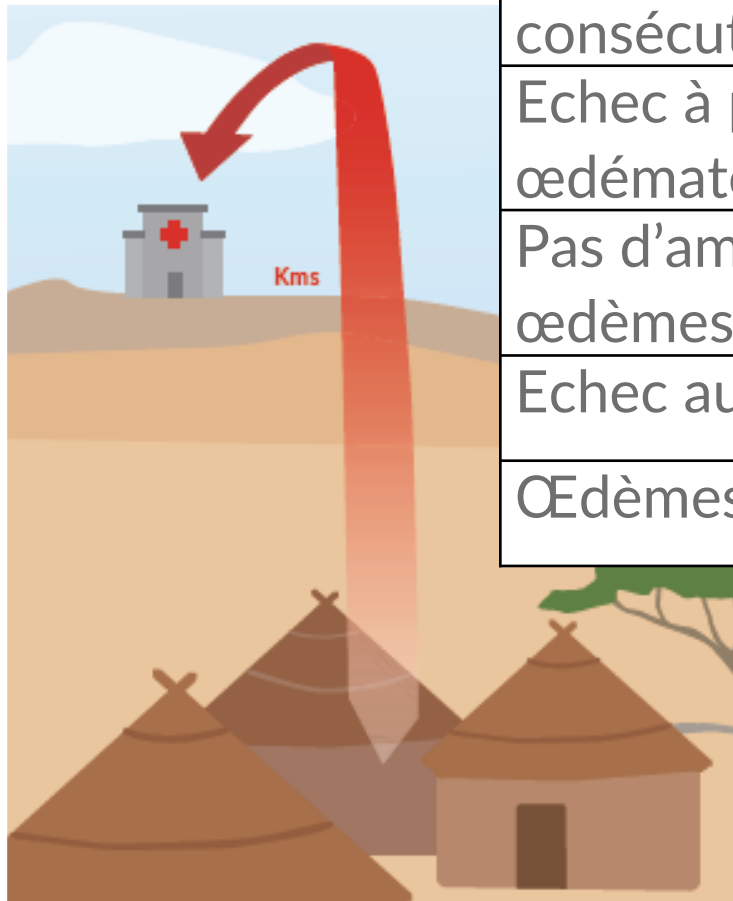

|                                                                      |              |
|----------------------------------------------------------------------|--------------|
| Perte de poids depuis l'admission                                    | 7 jours      |
| Perte de poids (enfants non-œdémateux) durant 2 visites consécutives | Toute visite |
| Echec à prendre du poids ( non-œdémateux)                            | 14 jours     |
| Pas d'amorce de la fonte des œdèmes                                  | 14 jours     |
| Echec au test de l'appétit                                           | Toute visite |
| Œdèmes encore présents                                               | 21 jours     |

# CONSEILS NUTRITIONNELS À DONNER À LA MÈRE À LA DÉCHARGE

---

1. Encourager les mères à continuer l'allaitement;
2. Appuyer, encourager et renforcer les pratiques recommandées d'alimentation ;
3. Appuyer, encourager et renforcer les pratiques d'alimentation de complément recommandées en utilisant les aliments disponibles localement ;
4. Encourager les visites mensuelles de suivi de croissance ;
5. Améliorer les comportements liés à la santé ;
6. Encourager les mères à participer aux groupes de soutien à l'ANJE ;

# MESSAGES CLÉS

---

| Question                                             | Réponse                                                                                                                                                                                                                                                                                                    |
|------------------------------------------------------|------------------------------------------------------------------------------------------------------------------------------------------------------------------------------------------------------------------------------------------------------------------------------------------------------------|
| 1. quels sont les types de sortie                    | <ul style="list-style-type: none"><li>• Guéri</li><li>• Abandon</li><li>• Non- réponse: référé</li><li>• Décès</li><li>• Transfert</li></ul>                                                                                                                                                               |
| 2. Cas sortie guéri                                  | <ul style="list-style-type: none"><li>• Enfant avec PB vert pendant deux visites consécutives</li></ul>                                                                                                                                                                                                    |
| 3. Quelles sont les cas de non réponse au traitement | <ul style="list-style-type: none"><li>• Perte de poids depuis l'admission</li><li>• Perte de poids durant 2 visites consécutives</li><li>• Echec à prendre du poids 14 jours</li><li>• Echec au test de l'appétit</li><li>• Pas d'amorce de la fonte des œdèmes</li><li>• Œdèmes encore présents</li></ul> |



# QUESTIONS RAPIDES

---

| L'enfant présente-t-il la malnutrition aigüe sévère ?                  | Oui | Non | Référer l'enfant | Admis |
|------------------------------------------------------------------------|-----|-----|------------------|-------|
| Sam – PB rouge, sans complications médicales, test de l'appétit faible | X   |     | X                |       |
| Hassane- PB vert, 2 mois, vomit tout ce qu'il ingère                   |     | X   | X                |       |
| Murat -sans œdèmes, PB rouge, test de l'appétit bon                    | X   |     |                  | X     |
| La beauté –PB jaune, avec toux depuis deux jours                       |     | X   |                  | X     |
| Marco – œdèmes bilatéraux , PB rouge, diarrhée plus de 2 semaines      | X   |     |                  | X     |
| Aminou- œdèmes bilatéraux , PB jaune, toux depuis 1 semaine            |     | X   |                  | X     |
| Salimata- PB rouge, test appétit bon, fièvre depuis 2 jours            | X   |     |                  | X     |



Insérez votre site web



# **MODULE 6**

## **REPORTAGE**

Module de Formation des Agents de Santé  
Communautaire sur le Protocole PCIMA

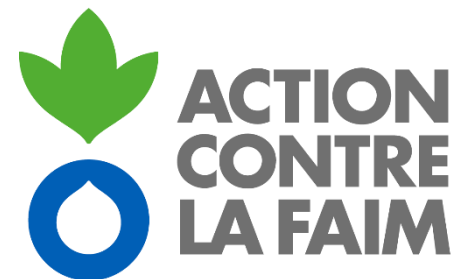

# OBJECTIFS DU MODULE 6

---

A la fin de ce module, l'agent de santé communautaire (ASC) doit être capable de comprendre et remplir:

1. Remplir le registre CRENAS
2. Remplir les fiches individuelles de suivi de l'enfant MAS (CRENAS)
3. Remplir la Fiche de transfert et le rapport mensuel
4. Notification des cas

# MÉTHODE

---

Ce module, sera entièrement en pratique.

1. Chaque participant va recevoir des copies en papiers du registre CRENAS, fiche individuelle de suivi l'enfant MAS, fiche de transfert
2. Le travail sera fait en groupes de deux personnes
3. Le formateur va partager les cas cliniques
4. Le formateur va faciliter le travail par groupe

# CAS CLINIQUE

---

## Cas clinique

Mamadou Traoré, 8 mois arrive au site ASC le 23 mars 2020.  
Prénom et Nom de la mère: Salimata Sangaré , Prénom du père :Aminou.

Adresse : Korofina Sud

## A l'admission

Pas de pâleur palmaire , respiration normale, pas de fièvre,  
poids : 4, 200 kg; PB: 113mm, pas d'œdèmes bilatéraux

## 4 -ème Visite

Diarrhée avec du sang durant 1 semaine  
Poids: 4, 300 kg, PB: 114mm, pas d'œdèmes bilatéraux

## Sortie

Transfer au centre de santé

# REGISTRE ENFANT MAM

| No d'ordre | Prénom et Nom | Adresse et N° Tél. | NCIAC | Enfants      |            |            | Femmes |          | Admission |              |             |         |            | Vitamine A  |      | Alben/Mében |      | Fer-acide fol |      |
|------------|---------------|--------------------|-------|--------------|------------|------------|--------|----------|-----------|--------------|-------------|---------|------------|-------------|------|-------------|------|---------------|------|
|            |               |                    |       | Suivi ex MAS | Age (mois) | Sexe( M/F) | FE/FA  | Age(ans) | Date      | Poids (kg.g) | Taille (cm) | PB (mm) | P/T ou IMC | Poids cible | Date | Dose        | Date | Dose          | Date |
|            |               |                    |       |              |            |            |        |          |           |              |             |         |            |             |      |             |      |               |      |
|            |               |                    |       |              |            |            |        |          |           |              |             |         |            |             |      |             |      |               |      |
|            |               |                    |       |              |            |            |        |          |           |              |             |         |            |             |      |             |      |               |      |
|            |               |                    |       |              |            |            |        |          |           |              |             |         |            |             |      |             |      |               |      |
|            |               |                    |       |              |            |            |        |          |           |              |             |         |            |             |      |             |      |               |      |

## Admission

Ne pas oublier le PB  
poids et les oedèmes

# REGISTRE ENFANT MAM

| Ration |      | visite 1 |         |              |        |      | visite 2 |         |              |        |      | Visite 3 |         |              |        |      | visite 4 |         |              |        |      |
|--------|------|----------|---------|--------------|--------|------|----------|---------|--------------|--------|------|----------|---------|--------------|--------|------|----------|---------|--------------|--------|------|
| Qtité  | Type | Date     | PB (mm) | Poids (kg.g) | Ration |      | Date     | PB (mm) | Poids (kg.g) | Ration |      | Date     | PB (mm) | Poids (kg.g) | Ration |      | Date     | PB (mm) | Poids (kg.g) | Ration |      |
|        |      |          |         |              | Qtité  | Type |
|        |      |          |         |              |        |      |          |         |              |        |      |          |         |              |        |      |          |         |              |        |      |
|        |      |          |         |              |        |      |          |         |              |        |      |          |         |              |        |      |          |         |              |        |      |
|        |      |          |         |              |        |      |          |         |              |        |      |          |         |              |        |      |          |         |              |        |      |
|        |      |          |         |              |        |      |          |         |              |        |      |          |         |              |        |      |          |         |              |        |      |

| Visite 5 |            |                 |                |        |      | Visite 6 |            |                 |        | Visite 7 |      |            |                 | Visite 8 |      |      |            | Sorties         |                |                  |                |        |      |                                                                                   |  |  |  | Stimulation<br>psycho cognitive |
|----------|------------|-----------------|----------------|--------|------|----------|------------|-----------------|--------|----------|------|------------|-----------------|----------|------|------|------------|-----------------|----------------|------------------|----------------|--------|------|-----------------------------------------------------------------------------------|--|--|--|---------------------------------|
| Date     | PB<br>(mm) | Poids<br>(kg.g) | Taille<br>(cm) | Ration |      | Date     | PB<br>(mm) | Poids<br>(kg.g) | Ration |          | Date | PB<br>(mm) | Poids<br>(kg.g) | Ration   |      | Date | PB<br>(mm) | Poids<br>(kg.g) | Taille<br>(cm) | PIT<br>ou<br>IMC | Poids<br>cible | Ration |      | Type de sortie(guéri, abandon,<br>déces, référence/non<br>répondant, suivi ex mas |  |  |  |                                 |
|          |            |                 |                | Qtité  | Type |          |            |                 | Qtité  | Type     |      |            |                 | Qtité    | Type |      |            |                 |                |                  |                | Qtité  | Type |                                                                                   |  |  |  |                                 |
|          |            |                 |                |        |      |          |            |                 |        |          |      |            |                 |          |      |      |            |                 |                |                  |                |        |      |                                                                                   |  |  |  |                                 |
|          |            |                 |                |        |      |          |            |                 |        |          |      |            |                 |          |      |      |            |                 |                |                  |                |        |      |                                                                                   |  |  |  |                                 |
|          |            |                 |                |        |      |          |            |                 |        |          |      |            |                 |          |      |      |            |                 |                |                  |                |        |      |                                                                                   |  |  |  |                                 |
|          |            |                 |                |        |      |          |            |                 |        |          |      |            |                 |          |      |      |            |                 |                |                  |                |        |      |                                                                                   |  |  |  |                                 |
|          |            |                 |                |        |      |          |            |                 |        |          |      |            |                 |          |      |      |            |                 |                |                  |                |        |      |                                                                                   |  |  |  |                                 |

A toute visite, PB ,  
poids et ASPE



# REGISTRE ENFANT MAS

| Admission dans la structure |                  |         |             |         |         |          |       |            |           |            |                 |                      |
|-----------------------------|------------------|---------|-------------|---------|---------|----------|-------|------------|-----------|------------|-----------------|----------------------|
| Mode d'Admission            | TYPE D'ADMISSION |         |             |         | Sex F/M | Age mois | PB mm | Poids kg,g | Taille cm | P/T ou IMC | Céd. 0,+,++,+++ | pathologie associées |
|                             | NC               | Rechute | Réadmission | TN / TM |         |          |       |            |           |            |                 |                      |
|                             |                  |         |             |         |         |          |       |            |           |            |                 |                      |
|                             |                  |         |             |         |         |          |       |            |           |            |                 |                      |
|                             |                  |         |             |         |         |          |       |            |           |            |                 |                      |
|                             |                  |         |             |         |         |          |       |            |           |            |                 |                      |

Admission  
Spontanée  
Dépistage actif

Admission  
Ne pas oublier le PB  
poids et les oedèmes

# REGISTRE ENFANT MAS

## ANNEXES

| Sortie     |            |           |            |                 |       | Type de Sortie |       |         |               |                       | Date du Poids Minimum | Poids Minimum | Seances stimulation psychocognitive | Seances CCSC | Observations |
|------------|------------|-----------|------------|-----------------|-------|----------------|-------|---------|---------------|-----------------------|-----------------------|---------------|-------------------------------------|--------------|--------------|
| Date jj/mm | Poids kg,g | Taille cm | P/T ou IMC | CEd. 0,+,++,+++ | PB mm | guéri          | décès | abandon | Non repondant | trans/reréfèr Nut/Med |                       |               |                                     |              |              |
|            |            |           |            |                 |       |                |       |         |               |                       |                       |               |                                     |              |              |
|            |            |           |            |                 |       |                |       |         |               |                       |                       |               |                                     |              |              |

Décharge  
Mesures  
anthropométriques à la  
décharge

Décharge  
Type de sortie

# FICHE INDIVIDUELLE DE SUIVI DE L'ENFANT MAS

| Fiche de Suivi URENAS                                                                                                       |           |                                                                                |                                         |
|-----------------------------------------------------------------------------------------------------------------------------|-----------|--------------------------------------------------------------------------------|-----------------------------------------|
| N° MAS..... N° Enreg..... Date d'Admission.....                                                                             |           |                                                                                |                                         |
| Nom URENAS..... Région..... District.....                                                                                   |           |                                                                                |                                         |
| Critère d'Admission PB.....mm P/T.....Z-score P/T.....% IMC.....                                                            |           |                                                                                |                                         |
| Nom et prénom du patient.....                                                                                               |           | Allaité(e) Oui <input type="checkbox"/> Non <input type="checkbox"/>           |                                         |
| Prénom du père.....                                                                                                         |           | Carte de vaccination Oui <input type="checkbox"/> Non <input type="checkbox"/> |                                         |
| Nom et Prénom de la mère.....                                                                                               |           | Vaccination à jour Oui <input type="checkbox"/> Non <input type="checkbox"/>   |                                         |
| Age (mois)..... Sexe.....                                                                                                   |           | Rougeole 1.....                                                                |                                         |
| Adresse.....                                                                                                                |           | 2.....                                                                         |                                         |
| Téléphone #.....                                                                                                            |           | Parents vivants Oui <input type="checkbox"/> Non <input type="checkbox"/>      |                                         |
| Admission : Information                                                                                                     |           |                                                                                |                                         |
| Avant le début du traitement (encadrer la réponse)                                                                          |           | TYPE d'ADMISSION                                                               |                                         |
| Référé , Spontané, Délivrance actif                                                                                         |           | <input type="checkbox"/> Nouvelle admission                                    |                                         |
| Durant le traitement                                                                                                        |           | <input type="checkbox"/> Transfert                                             |                                         |
| Transfert Oui <input type="checkbox"/> Non <input type="checkbox"/> Si Oui, de l'URENI ou de l'URENAS (encadrer la réponse) |           | <input type="checkbox"/> Rechute                                               |                                         |
| Nom de la structure..... N° d'Enregistrement.....                                                                           |           | <input type="checkbox"/> Réadmission après abandon de moins de 2 mois          |                                         |
| Date d'Admission PCIMA..... Date de Transfert.....                                                                          |           |                                                                                |                                         |
| Interrogatoire et examen clinique                                                                                           |           | Visite A Domicile (VAD)                                                        |                                         |
| Examiner                                                                                                                    |           | DATE VAD                                                                       | RAISON(S)                               |
| Etat du Patient : .....                                                                                                     |           |                                                                                | CONCLUSION                              |
| Handicap : Oui <input type="checkbox"/> Non <input type="checkbox"/> Si Oui, .....                                          |           |                                                                                |                                         |
| Respiration (à quantifier) : .....                                                                                          |           |                                                                                |                                         |
| Yeux : paieur Oui <input type="checkbox"/> Non <input type="checkbox"/>                                                     |           |                                                                                |                                         |
| Reference Vers URENI / Transfert URENAS - URENAS durant le traitement                                                       |           |                                                                                |                                         |
| DATE                                                                                                                        | RAISON(S) | Nom du centre                                                                  | RESULTAT (RETOUR-DATS/NON RETOUR/DECES) |
|                                                                                                                             |           |                                                                                |                                         |
| observations                                                                                                                |           |                                                                                |                                         |
|                                                                                                                             |           |                                                                                |                                         |

Données sur l'affiliation de l'enfant

| Admission : Taille Couchée/Debout.....cm Poids Cible.....kg |                                  |            |                      |              |      |            |   |   |  |
|-------------------------------------------------------------|----------------------------------|------------|----------------------|--------------|------|------------|---|---|--|
| Semaines                                                    | Adm                              | 2          | 3                    | 4            | 5    | 6          | 7 | 8 |  |
| Date (j/m/a)                                                |                                  |            |                      |              |      |            |   |   |  |
| Poids (kg)                                                  |                                  |            |                      |              |      |            |   |   |  |
| PS (mm)                                                     |                                  |            |                      |              |      |            |   |   |  |
| Test App.<br>(DonMoyen/Fabri)                               |                                  |            |                      |              |      |            |   |   |  |
| Diarrhées (0 à 10<br>(%))                                   |                                  |            |                      |              |      |            |   |   |  |
| Vomits (0 à 10<br>(%))                                      |                                  |            |                      |              |      |            |   |   |  |
| Morve (0 à 10<br>(%))                                       |                                  |            |                      |              |      |            |   |   |  |
| Toux (0 à 10<br>(%))                                        |                                  |            |                      |              |      |            |   |   |  |
| Dermatoses                                                  |                                  |            |                      |              |      |            |   |   |  |
| Conj. Pâles (0 à<br>+)                                      |                                  |            |                      |              |      |            |   |   |  |
| Respirations rap.                                           |                                  |            |                      |              |      |            |   |   |  |
| Temp. C°<br>(Axi/Rect.)                                     |                                  |            |                      |              |      |            |   |   |  |
| Réaction Test<br>Poli (0 à 10)                              |                                  |            |                      |              |      |            |   |   |  |
| ATPE (Nb sachets<br>sompés)                                 |                                  |            |                      |              |      |            |   |   |  |
| Séances<br>d'éducation<br>nutritionnelles<br>reçues         |                                  |            |                      |              |      |            |   |   |  |
| Séances de<br>stimulation<br>psychocognitive                |                                  |            |                      |              |      |            |   |   |  |
| Médicaments de Routine                                      |                                  |            |                      |              |      |            |   |   |  |
| Médicaments                                                 | Date (j/m/a)                     | Dose       | Médicaments          | Date (j/m/a) | Dose |            |   |   |  |
| Amoxicilline                                                |                                  |            | Anti-Helminthes      |              |      |            |   |   |  |
| Anti-Pala.                                                  |                                  |            | Vaccination Rougeole |              |      |            |   |   |  |
| Autres                                                      |                                  |            | Autres               |              |      |            |   |   |  |
| Traitement Spécifique                                       |                                  |            |                      |              |      |            |   |   |  |
| Date (j/m/a)                                                | Observations                     |            |                      |              |      | Traitement |   |   |  |
|                                                             |                                  |            |                      |              |      |            |   |   |  |
|                                                             |                                  |            |                      |              |      |            |   |   |  |
|                                                             |                                  |            |                      |              |      |            |   |   |  |
|                                                             |                                  |            |                      |              |      |            |   |   |  |
| Sortie : Date de Sortie ...../...../.....                   |                                  |            |                      |              |      |            |   |   |  |
| Guéri <input type="checkbox"/>                              | Abandon <input type="checkbox"/> | cause..... |                      |              |      |            |   |   |  |
| Décès <input type="checkbox"/>                              | cause.....                       |            |                      |              |      |            |   |   |  |
| Reference Vars URNI ..... 203                               |                                  |            |                      |              |      |            |   |   |  |
| Non Réponse ..... cause.....                                |                                  |            |                      |              |      |            |   |   |  |

## Admission et à chaque visite

## Décharge

### Type de sortie

# FICHE DE TRANSFERT

[illegible]

## Remplir la date et mesures anthropométriques à l'admission

## Remplir la raison du transfert/référence

# RAPPORT MENSUEL

## RAPPORT STATISTIQUE MENSUEL - URENAS/URENAM

| REGION : _____                                   |                     |           |       |                                                   |          |               |               |           |                         |                |                      |                                                          |                   |   |
|--------------------------------------------------|---------------------|-----------|-------|---------------------------------------------------|----------|---------------|---------------|-----------|-------------------------|----------------|----------------------|----------------------------------------------------------|-------------------|---|
| District: _____                                  |                     |           |       |                                                   |          |               |               |           |                         |                |                      |                                                          |                   |   |
| CSCOM: _____                                     |                     |           |       |                                                   |          |               |               |           |                         |                |                      |                                                          |                   |   |
| Hopital: _____ CSREF: _____                      |                     |           |       |                                                   |          |               |               |           |                         |                |                      |                                                          |                   |   |
| MOIS / ANNEE du rapport: _____ du _____ au _____ |                     |           |       |                                                   |          |               |               |           |                         |                |                      |                                                          |                   |   |
|                                                  | Total début du mois |           |       | Admission                                         |          |               |               | Total adm |                         | Transfert UREN |                      | Total général<br>Admission = Total<br>adm+Transfert UREN |                   |   |
|                                                  |                     |           |       | Nouveau cas                                       |          | Readmission   |               |           |                         |                |                      |                                                          |                   |   |
|                                                  |                     | M         | F     | Total                                             | M        | F             | M             | F         | M                       | F              | M                    | F                                                        | M                 | F |
| <b>URENAS</b>                                    |                     |           |       |                                                   |          |               |               |           |                         |                |                      |                                                          |                   |   |
| 6-59 mois                                        |                     |           |       |                                                   |          |               |               |           |                         |                |                      |                                                          |                   |   |
| >59 mois                                         |                     |           |       |                                                   |          |               |               |           |                         |                |                      |                                                          |                   |   |
| <b>URENAM</b>                                    |                     |           |       |                                                   |          |               |               |           |                         |                |                      |                                                          |                   |   |
| 6-23 mois                                        |                     |           |       |                                                   |          |               |               |           |                         |                |                      |                                                          |                   |   |
| 24-59 mois                                       |                     |           |       |                                                   |          |               |               |           |                         |                |                      |                                                          |                   |   |
| sup 59 mois                                      |                     |           |       |                                                   |          |               |               |           |                         |                |                      |                                                          |                   |   |
| FE/FA                                            |                     |           |       |                                                   |          |               |               |           |                         |                |                      |                                                          |                   |   |
| Ex MAS                                           |                     |           |       |                                                   |          |               |               |           |                         |                |                      |                                                          |                   |   |
| URENAS                                           | Guéris              |           | Décès |                                                   | Abandons |               | Total Sorties |           | Référés UREN/transferts |                | Total sortie general |                                                          | TOTAL FIN DU MOIS |   |
|                                                  | M                   | F         | M     | F                                                 | M        | F             | M             | F         | M                       | F              | M                    | F                                                        | M                 | F |
| 6-59 mois                                        |                     |           |       |                                                   |          |               |               |           |                         |                |                      |                                                          |                   |   |
| >59 mois                                         |                     |           |       |                                                   |          |               |               |           |                         |                |                      |                                                          |                   |   |
| <b>URENAM</b>                                    |                     |           |       |                                                   |          |               |               |           |                         |                |                      |                                                          |                   |   |
| 6-23 mois                                        |                     |           |       |                                                   |          |               |               |           |                         |                |                      |                                                          |                   |   |
| 24-59 mois                                       |                     |           |       |                                                   |          |               |               |           |                         |                |                      |                                                          |                   |   |
| > 59 mois                                        |                     |           |       |                                                   |          |               |               |           |                         |                |                      |                                                          |                   |   |
| FE/FA                                            |                     |           |       |                                                   |          |               |               |           |                         |                |                      |                                                          |                   |   |
| Ex MAS                                           |                     |           |       |                                                   |          |               |               |           |                         |                |                      |                                                          |                   |   |
| <b>cas spécifique</b>                            | 6-59 mois           | > 59 mois | FE/FA |                                                   |          |               |               |           |                         |                |                      |                                                          |                   |   |
| Nombre de tuberculeux                            |                     |           |       |                                                   |          |               |               |           |                         |                |                      |                                                          |                   |   |
| Nombre de PV VIH                                 |                     |           |       |                                                   |          |               |               |           |                         |                |                      |                                                          |                   |   |
|                                                  |                     |           |       | <b>Activités éducatives</b>                       |          | <b>Nombre</b> |               |           |                         |                |                      |                                                          |                   |   |
|                                                  |                     |           |       | Séances CCSC réalisées                            |          |               |               |           |                         |                |                      |                                                          |                   |   |
|                                                  |                     |           |       | Séances psychocognitives réalisées                |          |               |               |           |                         |                |                      |                                                          |                   |   |
|                                                  |                     |           |       | Séances de démonstration nutritionnelle réalisées |          |               |               |           |                         |                |                      |                                                          |                   |   |

# RECOMMANDATIONS POUR L'ASC

---

|                                       | Quoi remplir                                                         | Quand                                                        |
|---------------------------------------|----------------------------------------------------------------------|--------------------------------------------------------------|
| L'accueil                             | Registre                                                             | Admission                                                    |
| l'identification<br>signes de danger  | Registre<br>Fiche individuelle de<br>suivi enfant MAS                | Admission ( semaine 1)<br>Toutes les visites                 |
| Classification de<br>l'enfant, triage | Registre<br>Fiche individuelle de suivi<br>enfant MAS                | Admission                                                    |
| Traitement<br>nutritionnel            | Fiche individuelle de<br>suivi enfant MAS<br>Fiche de suivi de stock | Admission ( semaine 1)<br>Toutes les visites                 |
| Traitement<br>systématique            | Fiche individuelle de<br>suivi enfant MAS<br>Fiche de suivi de stock | Admission (semaine 1)<br>Visite ( semaine 2 et<br>semaine 4) |

# RECOMMANDATIONS POUR L'ASC

---

|                                       | Quoi remplir                                                         | Quand                                                        |
|---------------------------------------|----------------------------------------------------------------------|--------------------------------------------------------------|
| L'accueil                             | Registre                                                             | Admission                                                    |
| l'identification<br>signes de danger  | Registre<br>Fiche individuelle de<br>suivi enfant MAS                | Admission ( semaine 1)<br>Toutes les visites                 |
| Classification de<br>l'enfant, triage | Registre<br>Fiche individuelle de suivi<br>enfant MAS                | Admission                                                    |
| Traitement<br>nutritionnel            | Fiche individuelle de<br>suivi enfant MAS<br>Fiche de suivi de stock | Admission ( semaine 1)<br>Toutes les visites                 |
| Traitement<br>systématique            | Fiche individuelle de<br>suivi enfant MAS<br>Fiche de suivi de stock | Admission (semaine 1)<br>Visite ( semaine 2 et<br>semaine 4) |
| Référencement                         | Fiche de référencement                                               | A toute visite                                               |



# RECOMMANDATIONS POUR L'ASC

---

|               | Quoi remplir                                          | Quand                  |
|---------------|-------------------------------------------------------|------------------------|
| Référencement | Fiche de référencement                                | A toute visite         |
| Sortie        | Registre<br>Fiche individuelle de<br>suivi enfant MAS | Dernière visite Visite |
|               |                                                       |                        |



Insérez votre site web



Supplement: s1 [file s1]
