# Supplementary material for: Effectiveness and Coverage of Treatment for Severe Acute Malnutrition Delivered by Community Health Workers in the Guidimakha Region, Mauritania
Source: MDPI journal article supplement (doi:10.3390/children8121132), 2021-12-04
Supplement: s1 [file s1]

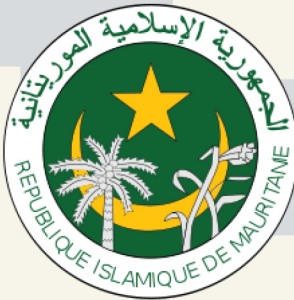

République Islamique de Mauritanie

# AGENDA DE FORMATION DES ASC SUR 21 JOURS

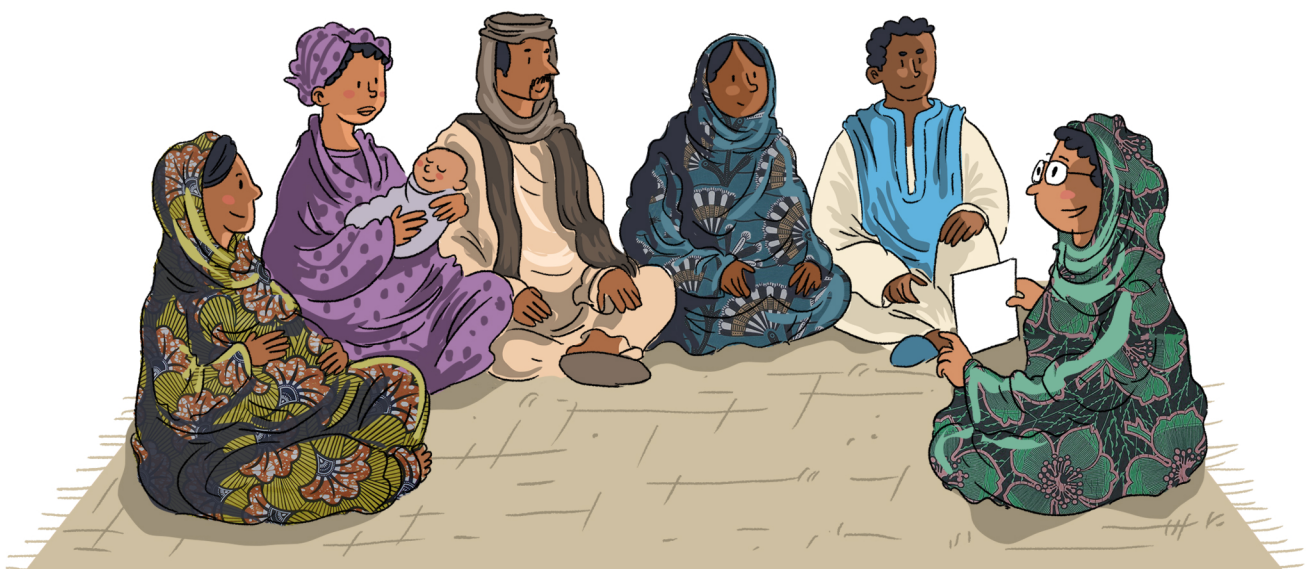

# SOMMAIRE

|                   |    |
|-------------------|----|
| 1. Jour 1 .....   | 3  |
| 2. Jour 2 .....   | 4  |
| 3. Jour 3 .....   | 5  |
| 4. Jour 4 .....   | 6  |
| 5. Jour 5 .....   | 7  |
| 6. Jour 6 .....   | 8  |
| 7. Jour 7 .....   | 9  |
| 8. Jour 8 .....   | 10 |
| 9. Jour 9 .....   | 11 |
| 10. Jour 10 ..... | 12 |
| 11. Jour 11 ..... | 13 |
| 12. Jour 12 ..... | 14 |
| 13. Jour 13 ..... | 15 |
| 14. Jour 14 ..... | 16 |
| 15. Jour 15 ..... | 17 |
| 16. Jour 16 ..... | 18 |
| 17. Jour 17 ..... | 19 |
| 18. Jour 18 ..... | 20 |
| 19. Jour 19 ..... | 21 |
| 20. Jour 20 ..... | 22 |
| 21. Jour 21 ..... | 23 |

# 01

## JOUR 1

| HORAIRES      | ACTIVITÉS                                                                                                                                      | RESPONSABLES |
|---------------|------------------------------------------------------------------------------------------------------------------------------------------------|--------------|
| 8H30 - 9H00   | SESSION 0 : INTRODUCTION (Ouverture, Présentation des participants, Normes, calendrier, désignation rapporteurs, chef de village, time keeper. |              |
| 9H00 - 10H00  | Partie I : Orientations, rôle et travail de l'ASC dans la communauté.                                                                          |              |
| 10H00 - 10H30 | <i>Pause-Café</i>                                                                                                                              |              |
| 10H30 - 11H30 | Partie II : Séance introductive<br>Rappel du cadre de la mise en œuvre de PCIME-C<br>Organisation de PCIME-C Objectif d'apprentissage          |              |
| 11H30 - 13H30 | SESSION 1 : Accueil de la mère, recueil des plaintes et identification du problème                                                             |              |
| 13H30 - 14H30 | <i>Pause-Déjeuner</i>                                                                                                                          |              |
| 14H30 - 16H00 | SESSION 1 : Prendre les constantes : la température et le périmètre brachial (PB)                                                              |              |
| 16H00 - 16H30 | <i>Pause-Café</i>                                                                                                                              |              |
| 16H30 - 17H00 | Synthèse de la journée                                                                                                                         |              |
| 17H00 - 17H30 | Réunion des facilitateurs                                                                                                                      |              |

## 02

## JOUR 2

| HORAIRES      | ACTIVITÉS                                                                         | RESPONSABLES |
|---------------|-----------------------------------------------------------------------------------|--------------|
| 8H30 - 10H00  | SESSION 1 : Prendre les constantes : la température et le périmètre brachial (PB) |              |
| 10H00 - 10H30 | <i>Pause-Café</i>                                                                 |              |
| 10H30 - 13H30 | SESSION 1 : Pratique sur la prise de la T° et MUAC                                |              |
| 13H30 - 14H30 | <i>Pause-Déjeuner</i>                                                             |              |
| 14H30 - 16H00 | SESSION 2: SIGNES GENERAUX DE DANGER                                              |              |
| 16H00 - 16H30 | <i>Pause-Café</i>                                                                 |              |
| 16H30 - 17H00 | Synthèse de la journée                                                            |              |
| 17H00 - 17H30 | Réunion des facilitateurs                                                         |              |

# 03

## JOUR 3

| HORAIRES      | ACTIVITÉS                                         | RESPONSABLES |
|---------------|---------------------------------------------------|--------------|
| 8H30 - 10H00  | SESSION 2 : Exercices et jeux de rôle             |              |
| 10H00 - 10H30 | <i>Pause-Café</i>                                 |              |
| 10H30 - 13H30 | SESSION 2 : Exercices et Jeux de rôle, pratique.  |              |
| 13H30 - 14H30 | <i>Pause-Déjeuner</i>                             |              |
| 14H30 - 16H00 | SESSION 2 : Note de référence et contre référence |              |
| 16H00 - 16H30 | <i>Pause-Café</i>                                 |              |
| 16H30 - 17H00 | Synthèse de la journée                            |              |
| 17H00 - 17H30 | Réunion des facilitateurs                         |              |

## 04

## JOUR 4

| HORAIRES      | ACTIVITÉS                                         | RESPONSABLES |
|---------------|---------------------------------------------------|--------------|
| 8H30 - 9H00   | SESSION 2 : Exercices, jeux de rôle, vidéo        |              |
| 9H00 - 10H00  | SESSION 2 : Fiche de prise en charge des soins    |              |
| 10H00 - 10H30 | <i>Pause-Café</i>                                 |              |
| 10H30 - 13H30 | SESSION 3 : Fièvre / Paludisme                    |              |
| 13H30 - 14H30 | <i>Pause-Déjeuner</i>                             |              |
| 14H30 - 16H00 | SESSION 3 : Fièvre / Paludisme, comment faire TDR |              |
| 16H00 - 16H30 | <i>Pause-Café</i>                                 |              |
| 16H30 - 17H00 | Synthèse de la journée                            |              |
| 17H00 - 17H30 | Réunion des facilitateurs                         |              |

**05****JOUR 5**

| HORAIRES      | ACTIVITÉS                                                           | RESPONSABLES |
|---------------|---------------------------------------------------------------------|--------------|
| 8H30 - 10H00  | SESSION 3 : Fièvre / Paludisme, comment faire TDR                   |              |
| 10H00 - 10H30 | <i>Pause-Café</i>                                                   |              |
| 10H30 - 13H30 | SESSION 4 : Toux ou rhume et difficultés respiratoires              |              |
| 13H30 - 14H30 | <i>Pause-Déjeuner</i>                                               |              |
| 14H30 - 16H00 | SESSION 4 : Toux ou rhume<br>Comment les évaluer et les répertorier |              |
| 16H00 - 16H30 | <i>Pause-Café</i>                                                   |              |
| 16H30 - 17H00 | Synthèse de la journée                                              |              |
| 17H00 - 17H30 | Réunion des facilitateurs                                           |              |

## 06

## JOUR 6

| HORAIRES      | ACTIVITÉS                                                      | RESPONSABLES |
|---------------|----------------------------------------------------------------|--------------|
| 8H30 - 10H00  | SESSION 5 : La diarrhée                                        |              |
| 10H00 - 10H30 | <i>Pause-Café</i>                                              |              |
| 10H30 - 13H30 | SESSION 5 : La diarrhée<br>Comment l'évaluer et la répertorier |              |
| 13H30 - 14H30 | <i>Pause-Déjeuner</i>                                          |              |
| 14H30 - 16H00 | SESSION 5 : La diarrhée, Exercice pratique et jeux de rôles    |              |
| 16H00 - 16H30 | <i>Pause-Café</i>                                              |              |
| 16H30 - 17H00 | Synthèse de la journée                                         |              |
| 17H00 - 17H30 | Réunion des facilitateurs                                      |              |



07

JOUR 7

| HORAIRES      | ACTIVITÉS                                                          | RESPONSABLES |
|---------------|--------------------------------------------------------------------|--------------|
| 8H30 - 10H00  | SESSION 6 : La Malnutrition chez l'enfant de 6 à 59 mois, Exercice |              |
| 10H00 - 10H30 | <i>Pause-Café</i>                                                  |              |
| 10H30 - 13H30 | SESSION 6 : La Malnutrition<br>Le dépistage actif, exercice        |              |
| 13H30 - 14H30 | <i>Pause-Déjeuner</i>                                              |              |
| 14H30 - 16H00 | SESSION 7 : La vaccination, Exercice                               |              |
| 16H00 - 16H30 | <i>Pause-Café</i>                                                  |              |
| 16H30 - 17H00 | Synthèse de la journée                                             |              |
| 17H00 - 17H30 | Réunion des facilitateurs                                          |              |

**08****JOUR 8**

| HORAIRES      | ACTIVITÉS                                                                           | RESPONSABLES |
|---------------|-------------------------------------------------------------------------------------|--------------|
| 8H30 - 10H00  | SESSION 8: Traiter l'enfant et conseiller la mère : Le Paludisme                    |              |
| 10H00 - 10H30 | <i>Pause-Café</i>                                                                   |              |
| 10H30 - 13H30 | SESSION 8: Traiter l'enfant et conseiller la mère : Le Paludisme                    |              |
| 13H30 - 14H30 | <i>Pause-Déjeuner</i>                                                               |              |
| 14H30 - 16H00 | SESSION 8: Traiter l'enfant et conseiller la mère : Le Paludisme, exercice pratique |              |
| 16H00 - 16H30 | <i>Pause-Café</i>                                                                   |              |
| 16H30 - 17H00 | Synthèse de la journée                                                              |              |
| 17H00 - 17H30 | Réunion des facilitateurs                                                           |              |

**09****JOUR 9**

| HORAIRES      | ACTIVITÉS                                                                                  | RESPONSABLES |
|---------------|--------------------------------------------------------------------------------------------|--------------|
| 8H30 - 10H00  | SESSION 8: Traiter l'enfant et conseiller la mère : La toux et le rhume                    |              |
| 10H00 - 10H30 | <i>Pause-Café</i>                                                                          |              |
| 10H30 - 13H30 | SESSION 8: Traiter l'enfant et conseiller la mère : La toux et le rhume                    |              |
| 13H30 - 14H30 | <i>Pause-Déjeuner</i>                                                                      |              |
| 14H30 - 16H00 | SESSION 8: Traiter l'enfant et conseiller la mère : La toux et le rhume, exercice pratique |              |
| 16H00 - 16H30 | <i>Pause-Café</i>                                                                          |              |
| 16H30 - 17H00 | Synthèse de la journée                                                                     |              |
| 17H00 - 17H30 | Réunion des facilitateurs                                                                  |              |

# 10

## JOUR 10

| HORAIRES      | ACTIVITÉS                                                                           | RESPONSABLES |
|---------------|-------------------------------------------------------------------------------------|--------------|
| 8H30 - 10H00  | SESSION 8 : Traiter l'enfant et conseiller la mère : La diarrhée                    |              |
| 10H00 - 10H30 | <i>Pause-Café</i>                                                                   |              |
| 10H30 - 13H30 | SESSION 8 : Traiter l'enfant et conseiller la mère : La diarrhée                    |              |
| 13H30 - 14H30 | <i>Pause-Déjeuner</i>                                                               |              |
| 14H30 - 16H00 | SESSION 8 : Traiter l'enfant et conseiller la mère : La diarrhée, exercice pratique |              |
| 16H00 - 16H30 | <i>Pause-Café</i>                                                                   |              |
| 16H30 - 17H00 | Synthèse de la journée                                                              |              |
| 17H00 - 17H30 | Réunion des facilitateurs                                                           |              |

# 11

## JOUR 11

| HORAIRES      | ACTIVITÉS                                                                                           | RESPONSABLES |
|---------------|-----------------------------------------------------------------------------------------------------|--------------|
| 8H30 - 10H00  | SESSION 8: Traiter l'enfant et conseiller la mère : La malnutrition aiguë sévère                    |              |
| 10H00 - 10H30 | <i>Pause-Café</i>                                                                                   |              |
| 10H30 - 13H30 | SESSION 8: Traiter l'enfant et conseiller la mère : La malnutrition aiguë sévère                    |              |
| 13H30 - 14H30 | <i>Pause-Déjeuner</i>                                                                               |              |
| 14H30 - 16H00 | SESSION 8: Traiter l'enfant et conseiller la mère : La malnutrition aiguë sévère, exercice pratique |              |
| 16H00 - 16H30 | <i>Pause-Café</i>                                                                                   |              |
| 16H30 - 17H00 | Synthèse de la journée                                                                              |              |
| 17H00 - 17H30 | Réunion des facilitateurs                                                                           |              |

# 12

## JOUR 12

| HORAIRES      | ACTIVITÉS                                                                               | RESPONSABLES |
|---------------|-----------------------------------------------------------------------------------------|--------------|
| 8H30 - 10H00  | SESSION 8 : Quand retourner à l'ASC                                                     |              |
| 10H00 - 10H30 | <i>Pause-Café</i>                                                                       |              |
| 10H30 - 13H30 | SESSION 8 : La visite de suivi<br>Le suivi des soins à domicile                         |              |
| 13H30 - 14H30 | <i>Pause-Déjeuner</i>                                                                   |              |
| 14H30 - 16H00 | SESSION 8 : La visite de suivi<br>Le suivi des soins à domicile, exercice jeux de rôles |              |
| 16H00 - 16H30 | <i>Pause-Café</i>                                                                       |              |
| 16H30 - 17H00 | Synthèse de la journée                                                                  |              |
| 17H00 - 17H30 | Réunion des facilitateurs                                                               |              |

# 13

## JOUR 13

| HORAIRES      | ACTIVITÉS                                                                               | RESPONSABLES |
|---------------|-----------------------------------------------------------------------------------------|--------------|
| 8H30 - 10H00  | SESSION 8 : La visite de suivi<br>Le suivi des soins à domicile, exercice jeux de rôles |              |
| 10H00 - 10H30 | <i>Pause-Café</i>                                                                       |              |
| 10H30 - 13H30 | SESSION 8 : La visite de suivi<br>Le suivi des soins à domicile, exercice jeux de rôles |              |
| 13H30 - 14H30 | <i>Pause-Déjeuner</i>                                                                   |              |
| 14H30 - 16H00 | SESSION 9 : GESTION DES ACTIVITES<br>Présentation des outils de gestion                 |              |
| 16H00 - 16H30 | <i>Pause-Café</i>                                                                       |              |
| 16H30 - 17H00 | Synthèse de la journée                                                                  |              |
| 17H00 - 17H30 | Réunion des facilitateurs                                                               |              |

# 14

## JOUR 14

| HORAIRES      | ACTIVITÉS                                                                        | RESPONSABLES |
|---------------|----------------------------------------------------------------------------------|--------------|
| 8H30 - 10H00  | SESSION 9 : GESTION DES ACTIVITES<br>Présentation des outils de gestion          |              |
| 10H00 - 10H30 | <i>Pause-Café</i>                                                                |              |
| 10H30 - 13H30 | SESSION 9 : GESTION DES ACTIVITES<br>Présentation des outils de gestion          |              |
| 13H30 - 14H30 | <i>Pause-Déjeuner</i>                                                            |              |
| 14H30 - 16H00 | SESSION 9 : GESTION DES ACTIVITES<br>Le stockage et l'inventaire des médicaments |              |
| 16H00 - 16H30 | <i>Pause-Café</i>                                                                |              |
| 16H30 - 17H00 | Synthèse de la journée                                                           |              |
| 17H00 - 17H30 | Réunion des facilitateurs                                                        |              |



# 15

## JOUR 15

| HORAIRES      | ACTIVITÉS                                                        | RESPONSABLES |
|---------------|------------------------------------------------------------------|--------------|
| 8H30 - 10H00  | SESSION 9 : Gestion des activités<br>Le lieu de stockage         |              |
| 10H00 - 10H30 | <i>Pause-Café</i>                                                |              |
| 10H30 - 13H30 | SESSION 9 : Gestion des activités<br>L'inventaire physique       |              |
| 13H30 - 14H30 | <i>Pause-Déjeuner</i>                                            |              |
| 14H30 - 16H00 | SESSION 9 : Gestion des activités<br>La commande des médicaments |              |
| 16H00 - 16H30 | <i>Pause-Café</i>                                                |              |
| 16H30 - 17H00 | Synthèse de la journée                                           |              |
| 17H00 - 17H30 | Réunion des facilitateurs                                        |              |

# 16

## JOUR 16

| HORAIRES      | ACTIVITÉS                                                                                         | RESPONSABLES |
|---------------|---------------------------------------------------------------------------------------------------|--------------|
| 8H30 - 10H00  | SESSION 9 : Gestion des activités<br>Elaboration du plan d'action de l'ASC<br>Exercices pratiques |              |
| 10H00 - 10H30 | <i>Pause-Café</i>                                                                                 |              |
| 10H30 - 13H30 | SESSION 9 : Gestion des activités<br>Elaboration du plan d'action de l'ASC<br>Exercices pratiques |              |
| 13H30 - 14H30 | <i>Pause-Déjeuner</i>                                                                             |              |
| 14H30 - 16H00 | SESSION 9 : Gestion des activités<br>Elaboration du plan d'action de l'ASC<br>Exercices pratiques |              |
| 16H00 - 16H30 | <i>Pause-Café</i>                                                                                 |              |
| 16H30 - 17H00 | Synthèse de la journée                                                                            |              |
| 17H00 - 17H30 | Réunion des facilitateurs                                                                         |              |

# 17

## JOUR 17

| HORAIRES      | ACTIVITÉS                                  | RESPONSABLES |
|---------------|--------------------------------------------|--------------|
| 8H30 - 10H00  | SESSION 10 : Remplir les outils de gestion |              |
| 10H00 - 10H30 | <i>Pause-Café</i>                          |              |
| 10H30 - 13H30 | SESSION 10 : Remplir les outils de gestion |              |
| 13H30 - 14H30 | <i>Pause-Déjeuner</i>                      |              |
| 14H30 - 16H00 | SESSION 10 : Remplir les outils de gestion |              |
| 16H00 - 16H30 | <i>Pause-Café</i>                          |              |
| 16H30 - 17H00 | Synthèse de la journée                     |              |
| 17H00 - 17H30 | Réunion des facilitateurs                  |              |

# 18

## JOUR 18

| HORAIRES      | ACTIVITÉS                                                               | RESPONSABLES |
|---------------|-------------------------------------------------------------------------|--------------|
| 8H30 - 10H00  | La promotion des pratiques familiales essentielles                      |              |
| 10H00 - 10H30 | <i>Pause-Café</i>                                                       |              |
| 10H30 - 13H30 | La promotion des pratiques familiales essentielles / Exercice pratiques |              |
| 13H30 - 14H30 | <i>Pause-Déjeuner</i>                                                   |              |
| 14H30 - 16H00 | La promotion des pratiques familiales essentielles / Exercice pratiques |              |
| 16H00 - 16H30 | <i>Pause-Café</i>                                                       |              |
| 16H30 - 17H00 | Synthèse de la journée                                                  |              |
| 17H00 - 17H30 | Réunion des facilitateurs                                               |              |

| HORAIRES      | ACTIVITÉS                                                               | RESPONSABLES |
|---------------|-------------------------------------------------------------------------|--------------|
| 8H30 - 10H00  | Les techniques de communication                                         |              |
| 10H00 - 10H30 | <i>Pause-Café</i>                                                       |              |
| 10H30 - 13H30 | Les techniques de communication<br>Exercices pratiques et jeux de rôles |              |
| 13H30 - 14H30 | <i>Pause-Déjeuner</i>                                                   |              |
| 14H30 - 16H00 | Les techniques de communication<br>Exercices pratiques et jeux de rôles |              |
| 16H00 - 16H30 | <i>Pause-Café</i>                                                       |              |
| 16H30 - 17H00 | Synthèse de la journée                                                  |              |
| 17H00 - 17H30 | Réunion des facilitateurs                                               |              |

# 20

## JOUR 20

| HORAIRES      | ACTIVITÉS                 | RESPONSABLES |
|---------------|---------------------------|--------------|
| 8H30 - 10H00  | Pratiques cliniques       |              |
| 10H00 - 10H30 | <i>Pause-Café</i>         |              |
| 10H30 - 13H30 | Pratiques cliniques       |              |
| 13H30 - 14H30 | <i>Pause-Déjeuner</i>     |              |
| 14H30 - 16H00 | Pratiques cliniques       |              |
| 16H00 - 16H30 | <i>Pause-Café</i>         |              |
| 16H30 - 17H00 | Synthèse de la journée    |              |
| 17H00 - 17H30 | Réunion des facilitateurs |              |

# 21

## JOUR 21

| HORAIRES      | ACTIVITÉS                                      | RESPONSABLES |
|---------------|------------------------------------------------|--------------|
| 8H30 - 10H00  | Post-test et synthèse générale de la formation |              |
| 10H00 - 10H30 | <i>Pause-Café</i>                              |              |
| 10H30-11H30   | Présentation des ASC aux autorités             |              |
| 11H30-12H30   | Présentation des ASC aux autorités             |              |
| 12H30-13H30   | Clôture de la formation                        |              |
| 13H30 - 14H30 | <i>Pause-Déjeuner</i>                          |              |
